# Supplementary material
Source: Copernicus journal article supplement (doi:10.5194/egusphere-2026-695)
Supplement: Supplementary file [file egusphere-2026-695-AC3-supplement.pdf]

### **Response to Reviewer #3**

We sincerely thank the reviewer for the thorough evaluation and highly constructive comments. We carefully analyzed all suggestions and substantially revised the manuscript to improve its technical clarity, numerical validation, and performance analysis.

Specifically, we clarified that the present study focuses on low-order P1 continuous Galerkin discretization and further distinguished the CG operators accelerated in this work from the DG components used elsewhere in the Fluidity-Atmosphere framework. We refined the descriptions of the GPU execution workflow, including the device-side sparse matrix assembly procedure, CPU–GPU data transfer process, and the interaction with PETSc-based solvers.

To better evaluate the effectiveness of the GPU implementation, we added detailed hardware utilization and bottleneck analyses based on NVIDIA Nsight Compute profiling, including FP64 throughput and memory bandwidth utilization. We also expanded the discussion on the suitability of assembled sparse operators versus matrix-free methods for low-order unstructured FEM frameworks. Furthermore, the validation methodology was significantly strengthened through additional fixed-mesh transient simulations, demonstrating machine-precision agreement between CPU and GPU results.

In addition, we revised Algorithm 1, improved the explanations of template parameters and implementation details in the appendices, clarified the CPU baseline and MPI terminology, and refined numerous technical descriptions and minor language issues throughout the manuscript to improve overall rigor.

Detailed point-by-point responses to all comments, along with a marked-up version of the revised manuscript highlighting the specific changes, are provided in the attached files.

#### **Comment 1:**

##### **Reviewer Comment:**

Please specify explicitly in the paper at some point what kind of Finite Element is used in the discretisation and in the tests of the code. Thus far, the only explicit statement in the the manuscript is that you are using continuous elements. However, that still leaves a lot of possibilities especially in the context of a mixed element discretisation for a CFD type problem.

This information is an important one, as it makes a significant difference computationally and w.r.t. performance optimisation, if you are using a P1 Lagrange element pair or a P3 one, or maybe a conforming Crouzeix-Raviart element.

From the text (e.g. Fig. 2 or the mentioning of a 4 x 4 local element matrix on p. 12) it seems that you are using a classical P1 element.

##### **Response:**

We sincerely thank the reviewer for this insightful observation. In the specific simulations and

benchmarks presented in this study, the dynamic framework utilizes linear Lagrange elements (P1) for the continuous Galerkin (CG) discretization. This inherently yields 4 degrees of freedom per tetrahedral element, which corresponds to the 4×4 local element matrices mentioned in the manuscript. We apologize for not stating this explicitly in the initial draft, as this information is indeed crucial for evaluating computational complexity and optimization strategies. We have now added a clear statement regarding the P1 element choice in Section 2 to eliminate any ambiguity.

**Changes in manuscript:**

Section 2: Target Scientific Application Definition

"Specifically, in the performance evaluations and benchmarks presented in this study, the dynamic framework predominantly utilizes linear Lagrange elements (P1) for the continuous Galerkin (CG) discretization. This choice inherently yields 4 degrees of freedom per tetrahedral element, resulting in the 4×4 local element matrices evaluated during the simulation."

**Comment 2**

**Reviewer Comment:**

In your experiments you measure runtimes and provide speed-up values comparing your GPU implementation to the CPU one. On the one hand the time-to-solution is, of course, a highly important aspect, since this is directly affecting the user. However, in order to evaluate the quality and potential of your optimisations other aspects would also be of significant interest.

- a) As you correctly state in Table 2 the theoretical FP64 peak performance of the A100 PCIe is 9.7 TFLOP/s. What percentage of this is reached by your GPU code?
- b) You repeatedly mention the "high bandwidth and massive parallelism" of GPUs. However, from Table 5 I would deduce that roughly a factor of speed-up of 20 results from optimisations such as "loop unrolling" and "templating". These would also benefit the CPU code of course. But, if I understand correctly, these are not in the version of the CPU code used for comparison, correct?
- c) In line 342 you mention "serial CPU execution", does that mean you are comparing a CPU code running on a single of the AMD Epyc's 64 cores to the GPU version? Does this hold for all results apart from the ones given in Table 9?
- d) What is the meaning of "CPU" in Table 9? Are you talking about a setup with 4 physical EPYC CPUs and one GPU here, or is this implying that you use MPI to parallelise the CPU part of the code and run it on 4 cores of the EPYC's 64 cores?

**Response:**

a) We appreciate the reviewer's question regarding hardware utilization. Using NVIDIA Nsight Compute (NCU), we profiled our GPU implementation. The compute-intensive element integration kernel (`dshape_tensor_dshape_unroll_matmul_t`) reaches 8.50% of the 9.7 TFLOP/s theoretical FP64 peak (Compute SM Throughput). The global assembly kernels (`assemble_csr_matrix` and `rhs_addto_kernel`) reach 7.93% and 18.29%, respectively.

These compute utilizations directly reflect the inherent memory-bound nature of unstructured finite element methods (FEM). The arithmetic intensity is inherently low due to the indirect memory fetching of mesh topology and nodal data required for local evaluations and sparse matrix

insertions.

Consequently, a more relevant metric for these kernels is Memory Throughput. Our NCU profiling shows the element integration kernel achieves 90.44% Memory Throughput, while the global matrix assembly and RHS addition kernels achieve 79.48% and 82.98%, respectively. Reaching approximately 80-90% of the A100's memory bandwidth under irregular memory access patterns indicates an efficient hardware utilization. We have added a "Hardware Utilization and Bottleneck Analysis" paragraph in Section 5.3 to clarify this point in the manuscript.

**Changes in manuscript:**

Section 5.3.3: Hardware Utilization and Bottleneck Analysis

"To further comprehend the GPU execution efficiency, we analyzed the hardware utilization of our core kernels using NVIDIA Nsight Compute. The theoretical FP64 peak performance of the A100 GPU is 9.7 TFLOP/s. However, in unstructured FEM frameworks, performance is predominantly bounded by memory bandwidth rather than compute capabilities. ... , maintaining such high memory bandwidth utilization demonstrates that our data layout and atomic-based assembly strategies effectively saturate the hardware limits for these memory-intensive workloads."

**Response:**

b) You make a highly valid point. Algorithmic optimizations like loop unrolling and templating indeed benefit CPU execution as well. To clarify our experimental baseline, the CPU version used for comparison is the official, unmodified production release of the Fluidity-Atmosphere framework. We chose this as our baseline to provide a realistic and practical reference point for current users of the model. While we did not manually inject templating into the original Fortran CPU source code, we ensured a fair hardware comparison by compiling the CPU code with aggressive compiler optimization flags (-O3 -ffast-math). Modern compilers (like GCC/Gfortran) are highly efficient at automatically applying loop unrolling and instruction scheduling for standard CPU architectures under the -O3 flag. In contrast, explicit loop unrolling and template metaprogramming were strictly necessary for the GPU implementation. Due to the GPU's unique warp-based execution model and strict register allocation limits, the nvcc compiler often struggles to automatically unroll complex, nested element-wise loops or resolve sizes at compile-time without explicit directives. Therefore, these manual optimizations on the GPU were applied to unlock the hardware's inherent capabilities rather than to create an algorithmic advantage over the CPU. We have added a clarification regarding this baseline comparison in Section 3.3 of the revised manuscript.

**Changes in manuscript:**

Section 3.3 GPU Parallelization of Element-wise Integration

"It should be noted that the CPU baseline used for comparison represents the official, unmodified production code of Fluidity-Atmosphere, compiled with aggressive optimization flags `\texttt{-O3 -ffast-math}`. ... Thus, these GPU-specific manual optimizations are implemented to fully unlock the hardware's architectural potential rather than to introduce an algorithmic disparity."

**Response:**

c&d) We apologize for the ambiguity in our terminology. The reviewer's understanding of the configuration is perfectly accurate. When we referred to "serial CPU execution" or "1 CPU", we meant 1 single CPU core (i.e., 1 MPI process) running on the 64-core AMD EPYC 7713 processor. This applies to all single-process baseline results in the manuscript.

Similarly, in Table 9 and the related text, "4 CPUs" specifically means 4 CPU cores (i.e., 4 MPI processes) utilized on that same single physical AMD EPYC processor, paired with one GPU. It does not refer to 4 distinct physical CPU sockets. To eliminate any confusion, we have systematically reviewed the entire manuscript and updated the terminology from "CPU" to "CPU core" or "MPI process" wherever appropriate, particularly in Table 9, Table 10, and their corresponding discussions.

### **Comment 3**

#### **Reviewer Comment:**

You repeatedly mention the high-bandwidth of GPUs. It would be nice to explain in more detail what you are referring to with this. Accessing host memory from the GPU through PCIe has a bandwidth of 32 GB/s (following Table 2). This is significantly slower than the maximal bandwidth for access to memory by the AMD EPYC. The latter being around 204.8 GB/s. So you are presumably referring to the bandwidth to the A100's HBM (device memory) which is 1.56 TB/s, aren't you? I'd also suggest to add these two hardware characteristics to Table 2.

#### **Response:**

We greatly appreciate the reviewer's precise technical correction. We completely agree that the term "high bandwidth" was used too loosely in the original manuscript. The true computational advantage of the GPU for memory-bound unstructured FEM kernels comes from the ultra-fast Device Memory (1.56 TB/s), rather than the PCIe interconnect (32 GB/s) which is indeed slower than the host CPU's memory bandwidth (204.8 GB/s).

Following your excellent suggestion, we have updated Table 2 to explicitly include both the AMD EPYC memory bandwidth and the NVIDIA A100 device memory bandwidth. Furthermore, we have refined the phrasing throughout the manuscript (e.g., in Sections 1, 3.3, and 4.1) to clearly specify "high-bandwidth device memory" whenever discussing the GPU's memory advantages, thereby ensuring technical rigor.

### **Comment 4**

#### **Reviewer Comment:**

As a note, the general trend in Finite-Element simulations for HPC seems to be to discard assembling a global matrix altogether and using matrix-free methods, see e.g. Kronbichler et al. (2012, 2019), Rudi (2015) or May (2015) to name a few. It would be appreciable to at least comment on this in your contribution.

#### **Response:**

We deeply appreciate the reviewer for highlighting this important trend in HPC finite-element simulations. We completely agree that matrix-free methods have become state-of-the-art, but as

you insightfully pointed out in Comment 1, our current dynamic framework relies on linear Lagrange elements (P1).

The transition to matrix-free evaluation is primarily driven by the performance characteristics of high-order FEM. As polynomial degree increases in high-order elements, the memory access and floating-point operations per degree of freedom (DoF) grow rapidly under a full-assembly framework, severely bottlenecking performance. Matrix-free methods, especially when combined with sum factorization, effectively suppress this per-DoF memory and computational complexity, thereby increasing computational intensity and overall efficiency (Fischer et al., 2020).

However, for low-order discretizations like our P1 elements, the memory access per DoF is already minimal and remains largely comparable between fully assembled and matrix-free operators. Consequently, applying matrix-free methods to low-order elements does not yield the significant bandwidth savings seen in high-order methods. Furthermore, explicitly assembling the global sparse matrix allows our framework to leverage highly optimized, generic Sparse Matrix-Vector multiplication (SpMV) routines and sophisticated algebraic preconditioners (such as Algebraic Multigrid or ILU via PETSc), which are indispensable for our implicit time-stepping schemes.

We have added a comprehensive discussion regarding this design choice and the boundary between low-order assembly and high-order matrix-free methods in Section 4. We also cited the excellent references you provided alongside the scalability analysis by Fischer et al.

#### **Changes in manuscript:**

Section 4: GPU Parallelization of Matrix Assembly

"Before detailing our assembly strategy, it is worth noting that a prominent trend in high-performance finite-element simulations is to discard global matrix assembly in favor of matrix-free (or partially assembled) operator evaluations \citep{RN\_Kronbichler2012, RN\_Kronbichler2019, RN\_Rudi2015}. ... Therefore, accelerating the global sparse matrix assembly remains the most rational and impactful optimization pathway for this class of low-order dynamical cores."

#### **Comment 5**

##### **Reviewer Comment:**

One of your key arguments (see e.g. line 162) is that element-wise computations are strictly local w/o cross-element dependencies. While that is mostly valid for continuous elements, I take from Li (2021) that Fluidity-Atmosphere is using a mixed DG/CG discretisation. Now in DG you typically have coupling to neighbouring elements, because your bilinear forms contain averages, jumps and fluxes on or over the facets of your tetrahedrons. Can you comment on that?

##### **Response:**

The reviewer makes a highly valid point, and we appreciate the careful reading of our previous work (Li et al., 2021). It is true that Fluidity-Atmosphere employs a mixed DG/CG formulation, and in the DG components (such as solving the continuity equation), calculating numerical fluxes and jumps inherently requires cross-element coupling over the facets.

However, as stated in Section 2 (around line 60), the GPU acceleration efforts and performance

evaluations presented in this specific study focus exclusively on the Continuous Galerkin (CG) scheme (e.g., the momentum and advection-diffusion solvers). In the CG formulation, the element-wise numerical integration to construct local mass and stiffness matrices is mathematically strictly local. The topological dependence on neighboring elements only manifests during the memory access phase of the subsequent global matrix assembly.

To prevent any confusion for readers familiar with our mixed formulation, we have clarified this distinction in Section 3.1, explicitly emphasizing that our "strictly local" claim applies specifically to the CG element-wise integrations addressed in this paper.

### **Changes in manuscript:**

#### Section 3.1: Data Structures and Parallelization Strategy

"It is important to clarify that while Fluidity-Atmosphere utilizes a mixed CG/DG discretization, the GPU acceleration in this study focuses exclusively on the Continuous Galerkin (CG) operators (e.g., for the momentum and advection-diffusion equations). In the CG formulation, the numerical integration to evaluate local matrices remains mathematically entirely local. Unlike DG methods, which require calculating inter-element fluxes and jumps over facets, the CG element-wise computations do not introduce cross-element mathematical dependencies during the integration phase. The global coupling arising from shared mesh nodes is manifested exclusively during the global matrix assembly phase through indirect memory access."

### **Comment 6**

#### **Reviewer Comment:**

Concerning Algorithm 1 I have several questions:

- a) As you appear to be using P1 elements, the gradients of the shape functions are constant. So why do you need to recompute these at every Gauss point?
- b) You do not explicitly state it, but it seems to me that you are using a standard affine mapping from the reference to the actual element. In this case the Jacobian matrix is also constant. Thus, it can be computed once for the element and needs not be recomputed at each Gauss point?
- c) In general precomputing and storing some quantities can improve performance, see e.g. Kronbichler (2012), Boehm (2025). Have you considered this, or can comment on it?

#### **Response:**

The reviewer makes an excellent and precise point: for linear P1 elements under standard affine mappings, both the shape function gradients and Jacobian matrices are constant and should not be redundantly recomputed at every Gauss point.

Prompted by your comment, we reviewed our manuscript and realized that the pseudo-code in Algorithm 1 was oversimplified and did not fully reflect our actual implementation. In the Fluidity-Atmosphere codebase (for both the CPU and our ported GPU versions), there is an explicit conditional check: `if (x_nonlinear .or. gi==1)`. For affine mappings (where `x_nonlinear` is false, such as with P1 elements), the computationally expensive operations—including the construction of the Jacobian matrix, its determinant, and its inverse—are executed only once at the first Gauss point. For all subsequent Gauss points, the cached constant values are directly reused. We have updated Algorithm 1 to accurately reflect this conditional optimization logic and added

explanatory text in Section 3.2 to remove any ambiguity. We appreciate you pointing this out, as it helped us improve the technical precision of the manuscript.

Regarding the precomputation strategy suggested by the reviewer (e.g., Kronbichler, 2012; Boehm, 2025): while highly effective on CPUs, unstructured FEM on GPUs is predominantly bottlenecked by memory bandwidth rather than compute capability. Storing these arrays for millions of elements would drastically increase the global memory footprint and memory traffic. Therefore, we deliberately adopt a "compute-on-the-fly" strategy, leveraging the GPU's abundant floating-point performance to conserve precious memory bandwidth.

#### **Changes in manuscript:**

Section 3.2: GPU Parallel Coordinate Transformation

"Algorithm 1 outlines the `transform_to_physical` procedure, where input and output arrays are stored contiguously to maximize memory efficiency. ... Furthermore, rather than precomputing and storing these geometric quantities, which would exacerbate memory traffic in this heavily memory-bound framework, we employ a "compute-on-the-fly" strategy, trading abundant GPU arithmetic cycles to conserve precious memory bandwidth \citep{RN\_Kronbichler2012, RN\_Boehm2025}."

#### **Comment 7**

#### **Reviewer Comment:**

Concerning your statement in Section 3.4 on the function-call overhead of these lightweight functions, is there no option to force the compiler to do inlining? Also I fail to see why there should be a problem with indirections in the case of using LAPACK's DPSEV? This is dense linear algebra after all. Also a 6 x 6 matrix of doubles occupies 288 bytes, shouldn't that easily fit into a typical 32K L1 data cache?

#### **Response:**

We fully agree that a 6x6 double-precision matrix (288 bytes) easily fits within the L1 data cache, and our original mention of cache misses for the dense solver was inaccurate.

However, regarding compiler inlining, standard library routines like LAPACK's DSPEV are typically pre-compiled external libraries. Without aggressive Link-Time Optimization (LTO), the host compiler cannot force-inline these external calls across translation units into the tight element loop. Consequently, calling such library routines millions of times incurs profound function-call overhead. Furthermore, standard dense solvers include internal argument validation and branching that entirely dwarf the actual floating-point arithmetic for tiny matrices. Our custom GPU `__device__` solvers bypass this by being fully inlineable and stripping away all external overhead. We have rewritten this section to accurately reflect the true source of these overheads.

#### **Changes in manuscript:**

Section 3.4: GPU Parallelization of Small-Scale Linear Algebra Solvers

"In addition to numerical integration, the construction of stabilization terms involves numerous small-scale linear algebraic operations, such as solving  $6 \times 6$  systems or computing eigen-decompositions of  $3 \times 3$  matrices. ... To address this challenge, this study implements

dedicated GPU-based small-matrix solvers and eigen-decomposition kernels as inline `\textbf{\texttt{\_\_device\_\_}}` operators."

## Comment 8

### Reviewer Comment:

With respect to the global matrix assembly, could you please provide more details on the procedure? Where does the assembly happen? Is the matrix first assembled in device memory and afterwards copied to the host memory, so that it can be used in PETSc? Or is the strategy different? I do not see that this is explained somewhere and there is also no mentioning of something in this direction in section 5.3.3.

### Response:

We apologize for this omission in our workflow description. The reviewer's hypothesis is completely accurate. To clarify the complete procedure: the global matrix assembly takes place entirely within the GPU's device memory. After the element-wise computations are completed on the GPU, a dedicated assembly kernel (as detailed in Appendix B) uses `atomicAdd` to accumulate the local element matrices directly into the pre-allocated global sparse matrix arrays (e.g., the CSR/BCSR values array) residing in the device memory. Once the parallel assembly kernel finishes execution, the fully populated global matrix arrays are copied back from the GPU device memory to the CPU host memory. Finally, this assembled matrix is passed to the CPU-based PETSc library for the subsequent linear system solve.

To ensure transparency and completeness, we have added a concluding paragraph to Section 4.3 to explicitly detail this execution pipeline, and cross-referenced this data transfer in Section 5.3.3.

### Changes in manuscript:

#### Section 4.3: GPU Parallel Element-Wise Assembly

"To summarize the complete execution pipeline, the global matrix assembly occurs entirely within the GPU device memory. Following the element-wise computations, the local element matrices are accumulated into the global sparse matrix arrays (i.e., the `\texttt{values}` array in CSR/BCSR format), which are pre-allocated on the GPU. This is achieved using the aforementioned parallel assembly kernel equipped with hardware-level `\texttt{atomicAdd}` operations. Upon the completion of the assembly kernel, the fully constructed global matrix arrays are transferred back to the CPU host memory via PCIe. The assembled matrix is then handed over to the CPU-bound PETSc library to perform the subsequent large-scale linear system solve."

#### Section 5.3.3: CPU–GPU Data Transfer and Overlap with Computation

"During Fluidity-Atmosphere computation, the type of data transferred frequently between the CPU and GPU includes scalar, vector, and tensor field arrays, the element–node connectivity array (`\textbf{\ndgln}`), `\textbf{as well as the fully assembled global sparse matrix arrays returning from the GPU device memory to the host for PETSc solvers}`."

## Comment 9

**Reviewer Comment:**

Concerning your validation strategy, I must admit that I find this not overly convincing. I agree with you that computations on the CPU and GPU and with different codes will not give bitwise identical results, which in the case of AMR indeed might lead to different meshes developing. However, assuming that both approaches leads to a sufficiently accurate approximate solution it should be perfectly okay to compare these as this is a FEM approach, shouldn't it? Maybe I do not understand how the "significant interpolation errors" arise? Anyway, wouldn't it be more convincing to use a fixed fine mesh for both cases and perform simulations that include the non-stationary initial part?

**Response:**

We sincerely appreciate this constructive suggestion. We fully agree that cross-mesh interpolation introduces numerical noise, and a fixed-mesh simulation starting from  $t=0$  is the most rigorous way to verify mathematical consistency.

Because a globally uniform fine mesh is computationally prohibitive for this 3D problem, we adopted a targeted static-mesh approach. Specifically, we extracted the refined unstructured mesh generated at  $t=3000$  s and used it as a fixed grid for both the CPU and GPU to simulate the non-stationary initial phase from  $t=0$  to  $t=3000$  s. This ensures an identical degree-of-freedom layout and completely eliminates spatial interpolation errors.

The new results (shown in the updated Figs. 4b and 4c) demonstrate that the peak absolute differences at  $t=3000$  s are  $1.44 \cdot 10^{-14}$  for vertical velocity and  $4.73 \cdot 10^{-15}$  for potential temperature perturbation. These differences strictly fall within the double-precision machine epsilon, perfectly validating the arithmetic correctness of our GPU operators.

We have updated Figure 4 to include this new transient validation alongside our original steady-state test, and substantially revised Section 5.2 to reflect this improved methodology.

**Changes in manuscript:**

Section 5.2: Validation Methodology

"In scientific applications demanding high-precision floating-point operations, microscopic rounding differences between CPU and GPU architectures are inevitable. In a fully dynamic simulation, these bit-wise differences can cause the Adaptive Mesh Refinement (AMR) algorithm to split elements differently over time. ... These minuscule variations strictly correspond to the double-precision machine epsilon, confirming that the GPU-accelerated operators are fundamentally and mathematically consistent with the original CPU baseline across all simulation phases."

**Comment 10****Reviewer Comment:**

What precisely is shown in Table 3? What is or what does `ele_val_scalar`?

**Response:**

We apologize for the lack of clarity. In Fluidity-Atmosphere, `ele_val_scalar` (along with its vector and tensor counterparts) is a data-gathering routine. Because node-based physical fields (e.g.,

density, velocity) are stored non-contiguously in global memory on unstructured meshes, these routines gather the scattered node values into contiguous local arrays for each element prior to numerical integration. Table 3 demonstrates the GPU's ability to accelerate this heavily memory-bound "gather" operation. We have updated the text in Section 5.3.1 to explicitly define the purpose of these functions.

### **Changes in manuscript:**

#### Section 5.3.1: GPU Element-wise Computation Performance

"Table 3 compares GPU and CPU performance in scalar, vector, and tensor data access. Specifically, functions such as `ele_val_scalar` serve as data-gathering routines that collect scattered node-based field values from global arrays into contiguous local memory arrays for each element prior to numerical integration. The results demonstrate the GPU's efficiency in accelerating these heavily memory-bound 'gather' operations."

### **Comment 11**

#### **Reviewer Comment:**

Appendix A, B & C: Showing these codelets is generally a nice idea. However, it would be more helpful, if there was explanation of the details of the template parameters and the function parameters. Can you explain, why `__restrict__` is used in `dot_product_t`, but not for the pointers in `matmul_t`? I'd assume that at least the memory buffer `C` must not alias with `a` or `b`? Also in `matmul_t`, line 428, it looks as if access to `C` and `b` was strided? Is this behaviour not counter-intuitive performance-wise in the innermost loop? In line 446 it seems a little bit fishy that the template arguments in the call to `matmul_t` are int literals and do not depend on the template arguments of `dshape_tensor_dshape_unroll_t`?

#### **Response:**

We appreciate the reviewer's detailed code review. We address these specific technical points as follows:

`__restrict__` in `matmul_t`: The reviewer is technically correct that the memory buffer `C` does not alias with `a` or `b`. During our optimization phase, we did test applying the `__restrict__` qualifier to all pointers in `matmul_t`. However, because these pointers reference extremely small, thread-local arrays that are aggressively lowered into registers by the NVCC compiler, adding `__restrict__` yielded no measurable performance difference in our profiling. Consequently, we kept the function signature simple and have opted to maintain the code snippet as originally implemented.

Strided access in `matmul_t`: The strided access ( $b[T\_K * n_i + k_i]$ ) is mathematically necessitated by Fluidity's underlying Fortran-based Column-Major memory layout. However, because `a`, `b`, and `C` are extremely small, thread-local arrays (typically heavily cached in registers or L1 cache), this strided access does not incur the severe performance penalties associated with global memory strides.

1,3,3 int literals: The `dshape_tensor_dshape` function inherently models 3D Cartesian spatial gradients interacting with a 3x3 physical tensor. We used 1,3,3 literals here intentionally to allow

the compiler to aggressively unroll this specific 3D physical operation without generating generic overhead. We have added detailed comments to the Appendices explaining the template parameters (e.g.,  $T\_dim$ ,  $T\_loc$ ,  $T\_ngi$ ) and the rationale behind the implementations.

## Comment 12

### Reviewer Comment:

Minor line-by-line comments (Lines 6, 11, 32, 64, 76, 92/93, 98, 107, 112, 166, 277, 279, 334, 346, References).

Response: We thank the reviewer for these highly constructive corrections. We have addressed all of them in the revised manuscript:

Lines 6, 45, & 107: We have corrected the formulation to consistently state that both matrix assembly and the linear solver are major contributors. Specifically, we rephrased Line 107 to accurately quantify that PETSc occupied roughly 37% of the runtime in the CPU baseline (referencing the new Table 10) and becomes the absolute bottleneck after GPU acceleration, resolving the previous contradiction.

Line 32: Rephrased to "can be formulated to satisfy discrete conservation properties," acknowledging that not all FE discretizations are inherently mass-conserving.

Line 64: Elaborated the challenges as "primarily due to indirect memory addressing and low arithmetic intensity."

Line 76: Added an explicit example: "(e.g., evaluating local mass or stiffness matrices via numerical integration)."

Line 166: In the revised manuscript, we have completely rewritten this paragraph (in Section 3.1) to explicitly state: "...thread block sizes of 128 and 256 were both utilized, with the specific parameter for each kernel determined empirically via NVIDIA Nsight Compute."

Line 279: Changed "computes" to "looks up the global index."

Line 334: Clarified "scalar data structure" as "arrays storing single-component variables per node."

Terminology & Formatting: Unified "nonlinear," corrected "MPI," fixed "shows," corrected "In our GPU," changed "function template optimization" to "optimization via the use of template functions," and cleaned the DOI resolver prefix in the BibTeX file.

# GPU-accelerated Finite-Element Method for the Three-dimensional Unstructured Mesh Atmospheric Dynamic Framework

Leisheng Li<sup>1</sup>, Ximeng Fu<sup>1,2</sup>, Xiyu Zheng<sup>1,2</sup>, Huiyuan Li<sup>1</sup>, and Jinxi Li<sup>3</sup>

<sup>1</sup>Institute of Software, Chinese Academy of Sciences, Beijing 100190, China

<sup>2</sup>University of Chinese Academy of Sciences, Beijing, 100190, China

<sup>3</sup>State Key Laboratory of Atmospheric Environment and Extreme Meteorology, Institute of Atmospheric Physics, Chinese Academy of Sciences, Beijing 100029, China

**Correspondence:** Jinxi Li (ljx2311@mail.iap.ac.cn)

**Abstract.** The three-dimensional unstructured-mesh finite-element atmospheric dynamical framework is gaining significance owing to its flexibility in representing complex topography and capability for multi-scale simulations in high resolutions. However, this framework has substantial bottlenecks. Unlike structured-grid models, the unstructured finite element method (FEM) must frequently access irregular mesh connectivity among nodes, edges, and elements, causing indirect memory addressing, inadequate data locality, and substantial memory bandwidth bottlenecks on conventional CPU architectures. Consequently, element-wise computations and global assembly are [among](#) the primary contributors [alongside the sparse linear solver](#) to the runtime in high-resolution simulations.

This study develops a GPU-parallel implementation of the Fluidity-Atmosphere dynamical core to address these challenges. The GPU-oriented data structures and optimized kernels are designed to efficiently leverage the computing power of GPUs. These kernels enable parallelized element integration and are efficient solvers for specific size matrices; a parallel assembly strategy enhances memory throughput during global sparse matrix construction. On the NVIDIA A100 GPU, the optimized kernels achieve speeds over 100× [compared to the single CPU core baseline](#) for element-wise computations and up to 389.02 times for global matrix assembly, resulting in an overall acceleration of 8.57 times with four messages passing interface (MPI) processes. The proposed framework demonstrates that tailored GPU parallelization is effective in overcoming the computational bottleneck of unstructured FEM-based atmospheric models, facilitating high-resolution simulations on heterogeneous architectures.

## 1 Introduction

Atmospheric dynamic frameworks are the fundamental tools for weather forecasting and climate simulation. In recent years, growing demands for the accurate prediction and management of extreme pollution and weather events have driven atmospheric models toward higher spatial resolutions and more sophisticated physical parameterizations. These advances create formidable computational challenges: doubling the spatial resolution can lead to exponential growth in computational cost, substantially increasing the demand for computing power and storage resources (Michalakes, 2020). For the discretization methods, the choice of scheme is primarily dependent on the topological structure of the underlying mesh. For high-resolution simulations,

models are now able to resolve increasingly complex underlying surface features, such as terrains and urban structures. Owing  
25 to their geometric constraints, traditional terrain-following coordinate grids typically produce significant mesh distortions near  
steep terrain, introducing significant computational errors. Therefore, conventional atmospheric models based on structured  
"horizontal + vertical" grid configurations encounter inherent limitations in representing complex terrain boundaries, offering  
inadequate flexibility for localized adaptation.

To address this challenge, fully three-dimensional (3D) unstructured grids have emerged as an effective solution. Replacing  
30 the conventional quasi-3D approach that separates horizontal and vertical discretization, unstructured grids provide superior  
geometric adaptability and more flexible mesh generation capabilities. The finite element method (FEM) proves particularly  
well-suited to such grid architectures, offering inherent advantages in handling complex geometrical configurations. This syn-  
ergistic combination has established FEM as an increasingly prominent methodology in atmospheric modeling (Farrell et al.,  
2009; Li et al., 2018). FEM not only ~~preserves conservation~~ can be formulated to satisfy discrete conservation properties and  
35 numerical stability on irregular geometries but also enables local mesh refinement in critical regions, thereby improving simu-  
lation accuracy (Takle and Russell, 1988; Li et al., 2021). To leverage these advantages, the Institute of Atmospheric Physics,  
Chinese Academy of Sciences, and AMCG group at Imperial College London jointly developed Fluidity-Atmosphere, a 3D  
adaptive atmospheric model (Davies et al., 2010). Based on the unstructured FEM, Fluidity-Atmosphere tightly couples the  
Navier-Stokes equations, complete advection-diffusion dynamics, and anisotropic adaptive mesh algorithms, facilitating dy-  
40 namic mesh optimization during simulations to capture multi-scale flow phenomena.

However, while the FEM on unstructured meshes provides superior geometric flexibility, it also introduces inherent compu-  
tational challenges that are absent in structured-grid models. In unstructured FEM frameworks such as Fluidity-Atmosphere,  
each element must frequently access irregularly connected nodes, edges, and faces during numerical integration and global  
sparse matrix assembly. This results in non-contiguous memory access, indirect addressing, and load imbalance across ele-  
45 ments. These challenges are typically absent in structured grids, where data are stored in regular arrays with predictable access  
patterns. Moreover, the adaptive mesh refinement (AMR) feature of Fluidity-Atmosphere dynamically modifies the mesh topol-  
ogy during simulations, further complicating the memory layout. Consequently, the two most time-consuming components,  
namely, element-wise computations and global sparse matrix assembly, become dominated by irregular data movement rather  
than floating-point arithmetic, causing substantial memory bandwidth bottlenecks on CPU architectures (Sulyok et al., 2019).

50 Meanwhile, the slowdown of Moore's law and energy-efficiency bottlenecks of CPUs render CPU-only optimization inad-  
equate for high-resolution simulations. In this context, GPUs have emerged as the widely used heterogeneous accelerators in  
high-performance computing. With massive parallelism and ~~high-memory bandwidth~~ high-bandwidth device memory, GPUs  
have delivered orders-of-magnitude speedups in many numerical applications (Czarnul et al., 2020). For atmospheric models,  
particularly those based on FEM, computational intensity primarily arises from solving large-scale linear systems, parameteriz-  
55 ing physical processes, and performing massive element-level operations, each amenable to GPU acceleration. Reengineering  
these components to run efficiently on GPUs has therefore become a key research direction.

Recent studies have reported significant advances in GPU acceleration of atmospheric models, including Navier-Stokes  
solvers (Goddeke et al., 2009; Thibault and Senocak, 2012), advection-diffusion equations (Simek et al., 2009), and iterative

solvers for implicit schemes (Müller et al., 2015), typically with speedups of several orders of magnitude. Some Earth system models such as ocean model (Petersen et al., 2025), tsunami model (Conde et al., 2025), cloud-resolving atmosphere model (Bogenschütz et al., 2025) and sea-ice model (Jendersie et al., 2025) also were accelerated using GPUs. FEM modules such as numerical integration (Macioł et al., 2010; Sanfui and Sharma, 2020), matrix assembly (Kiran et al., 2020; Sanfui and Sharma, 2021), and linear solvers (Ratnakar et al., 2021; Kiran et al., 2020) have been explored, achieving speedups from tens to hundreds of times. Typically, the solution of large sparse linear systems is regarded as the dominant cost in FEM-based simulations and has been extensively studied, with numerous GPU-parallel implementations already achieving mature performance. However, the computation of elements and subsequent matrix assembly may pose significant challenges, [primarily due to indirect memory addressing and low arithmetic intensity](#), particularly in large-scale unstructured atmospheric models. During each iteration, local element-wise matrices and right-hand sides must be computed and assembled into global sparse matrices. As the simulation domain expands, the number of mesh elements grows exponentially, leading to a proportional increase in computational cost. Without targeted optimization, the efficiency of the entire model can be substantially reduced.

In practice, element-wise computations and global matrix assembly involve frequent access to unstructured mesh data, where the topological relationships among points, edges, faces, and cells are maintained through multiple interlinked index arrays. These indirect data access operations disrupt spatial locality and cause irregular memory traffic, resulting in low cache utilization and high latency. Therefore, despite substantial progress in GPU acceleration of structured or semi-structured atmospheric models, unstructured FEM-based frameworks—characterized by irregular data dependencies and adaptive mesh refinement—still lack systematic and efficient GPU solutions. This study is primarily focused on addressing this research gap.

This study addresses these challenges by focusing on GPU parallelization and optimization of the two most time-consuming components of Fluidity-Atmosphere: **element-wise computations** and [\(e.g., evaluating local mass and stiffness matrices via numerical integration\)](#) and **global matrix assembly**. The primary contributions are as follows.

1. **GPU-based element-wise computations:** Multiple optimization techniques are applied to accelerate compute-intensive kernels via GPU offloading, achieving more than  $100\times$  speedups compared with CPU versions.
2. **GPU-based global matrix assembly:** Parallel strategies are designed and implemented for element-wise assembly.
3. **Integrated GPU implementation:** The GPU kernels are integrated into Fluidity-Atmosphere with pinned memory to optimize data transfer. The results show that GPU kernels facilitate speedups exceeding two orders of magnitude, with 4 MPI processes and one GPU, achieving an overall acceleration of ~~10.28~~ [8.57](#) times compared to a single CPU process.

The remainder of this paper is organized as follows. Section 2 introduces the program structure of Fluidity-Atmosphere, with emphasis on element-wise computations and global matrix assembly. Section 3 presents the GPU implementation and optimization of element-wise computations. Section 4 describes GPU-based global matrix assembly strategies. Section 5 evaluates the integrated GPU implementation and its performance. Section 6 concludes the paper, highlighting the future scope.

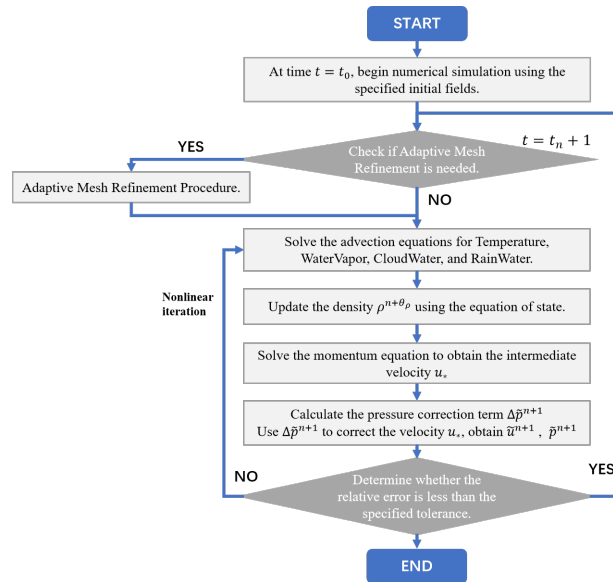

**Figure 1.** Time loop of Fluidity-Atmosphere.

## 90 2 Target Scientific Application Definition: Fluidity-Atmosphere

Fluidity-Atmosphere employs a mixed finite element/finite volume framework that incorporates the Navier-Stokes momentum equations, advection-diffusion equations for potential temperature and water vapor, and the compressible continuity equation within an anisotropic adaptive mesh algorithm. This design facilitates dynamic co-optimization of the mesh and physical fields. Fluidity-Atmosphere solves a coupled system of nonlinear equations with (typically) time-varying solutions. The time-

95 marching algorithm employed uses a ~~non-linear~~ nonlinear iteration scheme known as Picard iteration in which each equation is solved using the currently optimal solution for the other variables. The dynamical framework supports both the continuous Galerkin (CG) and discontinuous Galerkin (DG) finite element formulations. This study is focused exclusively on the CG scheme. Specifically, in the performance evaluations and benchmarks presented in this study, the dynamic framework predominantly utilizes linear Lagrange elements ( $P_1$ ) for the continuous Galerkin (CG) discretization. This choice inherently

100 yields 4 degrees of freedom per tetrahedral element, resulting in the 44 local element matrices evaluated during the simulation.

Figure 1 illustrates the general iteration loop of Fluidity-Atmosphere (Li et al., 2021). Fluidity-Atmosphere could invoke the adaptive algorithm at regular timesteps to ensure that the dynamics do not extend beyond the zone of adapted resolution. The adaptive algorithm has been parallelized using ~~MPIs~~ MPI processes, which run efficiently on CPUs. In our performance

105 profiling, the nonlinear iterations were predominant. In each timestep iteration, the model solves governing equations such as the advection-diffusion and momentum equations. The processes of solving these equations in Fluidity-Atmosphere typically are divided into two major computational stages:

110 (1) **Construct matrices:** For each element, numerical integration is performed using Gaussian quadrature to evaluate local stiffness, mass matrices, and right-hand side (RHS) vectors. These local contributions are subsequently inserted into the global sparse matrix system.

115 (2) **Solution of linear systems:** The assembled sparse matrices are solved using parallel numerical libraries such as PETSc, employing iterative solvers and preconditioners well-suited for large-scale sparse problems. The PETSc library has good performance and scalability. In the simulated case studies, its contribution to the overall runtime was ~~relatively small~~ significant portion ( 37%) in the CPU-only baseline, and as detailed later, it becomes the dominant bottleneck once the matrix assembly is accelerated on the GPU. In addition, PETSc already supports GPUs (Mills et al., 2021). Hence, future studies will be focused on the integration of Fluidity-Atmosphere and PETSc GPU computing.

120 The computation times of constructing matrices contributes significantly to the overall runtime. For instance, the Mountainwave3D simulation, in which the number of mesh nodes and mesh elements are 103635 and 554394, respectively. Table 1 shows ~~that~~ the computational times of constructing matrices in a timestep. In particular, the pressure diffusion matrix is used to calculate the stabilization term, which is only calculated at the first timestep or when the grid changes because of the adaptive process. In the Mountainwave3D simulation, the pressure diffusion matrix is computed every ten time steps. Without calculating the stabilization term, the total time of the timestep will decrease, but the proportion of time required to construct the matrices will slightly increase. ~~Consecutively~~ As quantified in Table 1, the processes of constructing matrices including account for approximately 60% of the total timestep duration in both scenarios (with and without the stabilization term). This high proportion confirms that accelerating element-wise computations and global matrix assembly have been identified as the primary computational bottlenecks to be addressed in this study is the most effective strategy for improving the overall performance of the Fluidity-Atmosphere model.

125 The processes of constructing matrices share highly similar loop patterns. Hence, their general workflow can be summarized as follows:

130 Step 1 **Preparing Data:** Initialize element mass matrices, right-hand sides, and local physical variables (such as velocity, density, and viscosity).

Step 2 **Coordinate transformation:** The `transform_to_physical` function maps shape function gradients into physical space and computes Gaussian weights (`detwei`).

Step 3 **Setup test function.**

135 Step 4 **Contribution evaluation:** Call physics modules to accumulate contributions into element matrices and right-hand sides. Several functions, each corresponding to a distinct physical process, such as mass, advection, diffusion, source, and viscosity terms, are called. In addition to the calculation of physical variables, these functions extensively call the integration calculation function on the elements such as `dshape_tensor_dshape`, `shape_dshape`, and `shape_shape`. In the process of assembling the pressure diffusion matrix, a special function named `get_edge_lengths`

140 (in which the small matrix solver is called) is used to calculate the element length scale in the physical space. All these functions are well-suited for GPU parallel computing.

Step 5 **Assembly**: Local contributions are inserted into the global matrix and RHS. The subsequent irregular insertion operations into the global matrix makes it highly data-intensive and memory-bound. Owing to the ~~high bandwidth of GPUs~~ massive throughput of GPU device memory, these functions can be accelerated on GPUs.

145 Therefore, the following sections describe the implementation and performance optimization methods of the element-wise computations and global matrix assembly on the GPU. ~~This study is based on-~~

Although the current implementation is specifically optimized for the NVIDIA A100 GPU hardware and utilizing the CUDA programming model (NVIDIA, 2025a), the proposed optimization strategies are largely hardware-agnostic at the algorithmic level. Specifically, the element-wise parallelization strategy (one-thread-per-element), the data layout design, and the sparse matrix assembly workflow are general and can be applied to other GPU architectures.

150 However, certain implementation details rely strictly on CUDA-specific hardware features, such as double-precision atomic operations in the L2 cache, memory hierarchy optimization, and specific kernel launch configurations. Porting the implementation to other platforms, such as AMD GPUs, would primarily involve adapting CUDA-specific APIs to alternative frameworks like HIP (AMD, 2025). Since HIP provides similar abstractions for thread hierarchy, memory management, and atomic operations,

155 the overall syntax porting effort is expected to be moderate.

Nevertheless, achieving true performance portability would require additional tuning to account for architectural differences in memory bandwidth, cache structure, and execution models. For instance, while NVIDIA V100 and A100 GPUs handle massive atomic updates highly efficiently, evaluating similar unstructured-grid applications on AMD CDNA architectures (e.g., MI100) has shown that standard atomic updates can incur higher penalties, sometimes necessitating alternative data restructuring or register-based aggregation to achieve optimal efficiency (Stone et al., 2021). Overall, the proposed algorithmic approach is expected to maintain its fundamental effectiveness across heterogeneous architectures, although achieving peak optimal performance on different platforms will inevitably require platform-specific tuning. Despite the availability of several programming models, CUDA is predominantly used because of its remarkable performance. Several programming models such as the heterogeneous computing interface for portability strive to be compatible with CUDA. Hence, porting to other

160 GPU hardware platforms will not encounter any significant obstacles (AMD, 2025).

165 ~~GPU hardware platforms will not encounter any significant obstacles (AMD, 2025).~~

### 3 GPU Parallelization of Element-wise Computations

In Fluidity-Atmosphere, element-level operations such as numerical integration and coordinate transformation constitute the core of unstructured finite element-wise computations. Profiling results indicate that these routines are invoked millions of times per timestep. Each nonlinear iteration involves re-evaluating element Jacobians, transforming basis functions, and accumulating

170 physical contributions for all elements, which cumulatively dominate the computational workload. These observations identify numerical integration and coordinate transformation as the primary performance bottlenecks and thus the key focus of GPU

**Table 1.** The computation times of constructing matrices

| Functional module                               | With stabilization term |            | Without stabilization term |               |
|-------------------------------------------------|-------------------------|------------|----------------------------|---------------|
|                                                 | CPU time(ms)            | Percentage | CPU time(ms)               | Percentage    |
| The advection-diffusion matrix<br>(Temperature) | 2477.545                | 4.84%      | 2466.594                   | 5.95%         |
| The advection-diffusion matrix<br>(WaterVapor)  | 2477.194                | 4.82%      | 2471.302                   | 5.96%         |
| The advection-diffusion matrix<br>(CloudWater)  | 2466.853                | 4.82%      | 2494.424                   | 6.02%         |
| The advection-diffusion matrix<br>(RainWater)   | 1785.827                | 3.49%      | 1799.104                   | 4.34%         |
| The momentum matrix                             | 13029.408               | 25.47%     | 12093.145                  | 29.19%        |
| The divergence matrix                           | 3662.082                | 7.16%      | 3634.111                   | 8.77%         |
| The pressure diffusion matrix                   | 3505.105                | 6.85%      |                            |               |
| The projection matrix                           | 1126.747                | 2.20%      | 1125.822                   | 2.72%         |
| Total of constructing matrices                  | <b>30530.760</b>        | 59.68%     | <b>26084.502</b>           | <b>62.96%</b> |
| Others                                          | 20625.871               | 40.32%     | 15348.450                  | 37.04%        |
| Total timestep duration                         | 51156.631               | 100.00%    | 41432.952                  | 100.00%       |

parallelization in this study. The computation for each mesh element can be performed independently of others, making this step an ideal candidate for parallelization (Georgescu et al., 2013). GPUs feature a massively parallel processor architecture, which enables the simultaneous launch of a large number of parallel threads. These threads can be associated with different mesh elements to execute element-wise computations. These results are stored for subsequent assembly into the global matrix. Building on the workflow analysis in Section 2, this section presents the GPU implementation and optimization strategies for key subroutines, followed by a summary of general acceleration techniques.

### 3.1 Data Structures and Parallelization Strategy

In unstructured meshes, element connectivity must be explicitly stored. Each tetrahedral element in Fluidity-Atmosphere records four vertex indices. Physical variables are stored in a unified Fields data structure organized as (vertex index  $\times$  dimension) arrays: scalars (1D), vectors (3D), and tensors (9D). The same layout is adopted in GPU memory to ensure contiguous access and consistent indexing (Figure 2). Common fields such as density and temperature are stored as scalars, positions and velocities as vectors, and viscosity terms as tensors.

The element-wise computations in the FEM are intrinsically independent, making them particularly suitable for massively parallel execution on GPU architectures. Unlike spectral methods that involve global communication or high-order

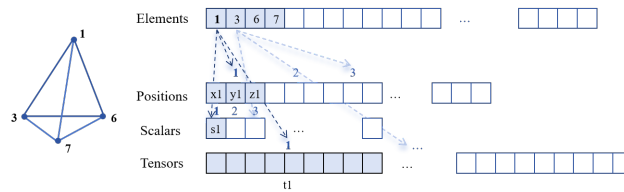

**Figure 2.** Data layout of elements and variables.

finite-difference schemes relying on extended stencils, finite-element computations are confined strictly within each element boundary. ~~Even when accuracy is increased, through higher-order polynomial interpolation or additional Gauss points, these operations remain entirely local without introducing~~ It is important to clarify that while Fluidity-Atmosphere utilizes a mixed CG/DG discretization, the GPU acceleration in this study focuses exclusively on the Continuous Galerkin (CG) operators (e.g., for the momentum and advection-diffusion equations). In the CG formulation, the numerical integration to evaluate local matrices remains mathematically entirely local. Unlike DG methods, which require calculating inter-element fluxes and jumps over facets, the CG element-wise computations do not introduce cross-element ~~dependencies~~ mathematical dependencies during the integration phase. The global coupling arising from shared mesh nodes is manifested exclusively during the global matrix assembly phase through indirect memory access.

This strong locality offers two principal advantages: (1) all element-wise computations can proceed independently, eliminating inter-thread communication during the compute phase; and (2) the workload is naturally balanced across elements, minimizing synchronization overhead. Consequently, a “one-thread-per-element” parallelization strategy is adopted. Each GPU thread handles one element. ~~Meanwhile, thread blocks typically contain~~ In our implementation, thread block sizes of 128 or and 256 threads; the parameters are tuned empirically to match kernel characteristics and maximize occupancy. This mapping enables tens of thousands of threads to execute concurrently, achieving high throughput and scalability for large-scale atmospheric simulations were both utilized, with the specific parameter for each kernel determined empirically via NVIDIA Nsight Compute. For the target mesh comprising 554,394 elements, a block size of 128 yields 4,332 blocks, while 256 yields 2,166 blocks. Given that the NVIDIA A100 GPU features 108 Streaming Multiprocessors (SMs), each with a theoretical maximum of 2,048 resident threads, both configurations generate sufficient numbers of thread blocks to provide approximately 2.5 execution waves across the GPU, which helps maintain high occupancy and effectively hide memory latency.

### 3.2 GPU Parallel Coordinate Transformation

With the data layout on GPUs established, the next step is to implement the core finite element operation: coordinate transformation. Using a reference element (in this study, a tetrahedron), shape functions and Gauss points are consistently defined. In Fluidity-Atmosphere, each physical element employs 11 Gauss points: four vertices, six edge midpoints, and the centroid (Figure 3). For each Gauss point, the transformation routine evaluates the integrand and multiplies it by the predefined weight.

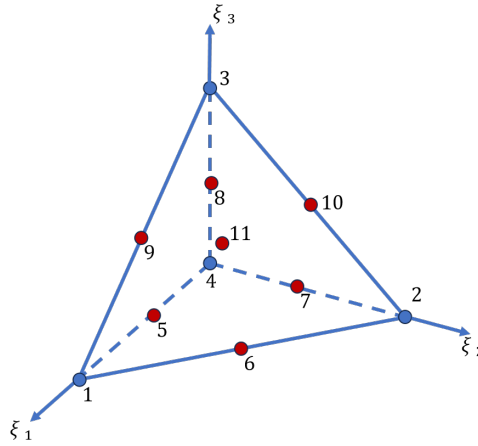

**Figure 3.** The reference element and Gauss points.

Even though element-independent and theoretically parallelizable, this kernel is computationally intensive and one of the most frequently executed routines in the model. For every iteration and every element, it performs numerous small matrix operations: matrix multiplications, adjoint and determinant evaluations, and transformations of derivative matrices.

**Algorithm 1** outlines the `transform_to_physical` procedure. ~~In addition, small-matrix operations such as Jacobian construction, adjoint computation, and determinant evaluation are optimized for GPU execution. Input and~~ where input and output arrays are stored contiguously in GPU memory to maximize access efficiency. to maximize memory efficiency. Crucially, the algorithm incorporates a conditional optimization for linear ( $P_1$ ) elements: because standard affine mappings yield a constant Jacobian matrix, expensive operations (Jacobian construction, determinant, and inverse) are evaluated only at the first Gauss point ( $g_i = 1$ ) and cached.

---

**Algorithm 1** Transform\_to\_physical

---

**Input:** Element nodal coordinates  $X$ , shape functions  $N$ , reference derivatives  $\nabla_{\xi}N$ , Gauss points  $g_i$ **Output:** Physical derivatives  $\nabla_x N$ , weights  $\text{detwei}$ ,  $J$ ,  $J^{-1}$ ,  $\det J$ 

```
1 for  $g_i = 1$  to  $n_{g_i}$  do
2   compute  $\nabla_{\xi}N(g_i)$ 
   if mapping is nonlinear or  $g_i == 1$  then
3     construct Jacobian matrix  $J \leftarrow X \cdot (\nabla_{\xi}N)^T$ 
       compute  $\text{adj}(J)$  and  $\det J$ 
       normalize inverse matrix  $J^{-1} \leftarrow \text{adj}(J)/\det J$ 
4   end
5   transform to physical derivatives  $\nabla_x N \leftarrow J^{-1} \cdot \nabla_{\xi}N$ 
   compute quadrature weights  $\text{detwei}(g_i) \leftarrow |\det J| \cdot w_{g_i}$ 
6 end
```

---

220 [The inner loop over Gauss points is deliberately retained to preserve framework generality for higher-order elements. Furthermore, rather than precomputing and storing these geometric quantities, which would exacerbate memory traffic in this heavily memory-bound framework, we employ a "compute-on-the-fly" strategy, trading abundant GPU arithmetic cycles to conserve precious memory bandwidth \(Kronbichler and Kormann, 2012; Böhm et al., 2025\).](#)

### 3.3 GPU Parallelization of Element-wise Integration

225 Element-wise integration routines constitute the computational core of unstructured finite-element models, as they are responsible for evaluating the contributions of each element to the global system. Profiling of Fluidity-Atmosphere indicates that these kernels are among the most frequently executed routines. During each nonlinear iteration, they are called once per element per physical equation, resulting in millions of invocations per timestep. As each call involves multi-dimensional tensor operations and numerical integration over multiple Gauss points, the accumulated cost dominates both the element-computation phase  
230 and the overall runtime of the model. Therefore, optimizing element integration is critical to achieving substantial end-to-end performance gains. The principal integration functions are as follows:

- **dshape\_tensor\_dshape** couples shape function gradients with tensor fields, supporting stabilization terms and physical field coupling.
- **shape\_shape** integrates shape functions to construct the mass matrix, required in momentum and energy conservation  
235 equations.
- **shape\_dshape** performs weighted integration of shape functions and their gradients at nodal points.

Among these functions, the **dshape\_tensor\_dshape** function is the most computationally intensive, as it involves both tensor-vector and vector-vector multiplications for every integration point. On the GPU, this procedure is parallelized at the

thread level, with each thread processing one element. Beyond kernel-level parallelization, a series of GPU-specific performance tuning techniques are applied to completely exploit the hardware potential. These optimizations are guided by profiling by employing NVIDIA Nsight Compute, focusing on reducing memory latency, register pressure, and control overhead:

- **Memory optimization:** The `__restrict__` qualifier is applied to pointer variables to eliminate aliasing and enable more aggressive memory-access optimizations. Small `__device__` functions are annotated with `__forceinline__` to reduce function-call overhead.
- **Loop optimization:** Loop-invariant expressions (particularly global memory accesses) are hoisted outside the loop body; manual loop unrolling or `#pragma unroll` directives are applied to innermost loops to reduce control overhead and increase instruction-level parallelism.
- **Template metaprogramming:** As the dimensions of the different matrices and vectors are already known at compile time, the `__device__` functions such as matrix-matrix product and dot product are implemented as templates, facilitating the compiler to apply deeper optimizations for specific instantiations.

These measures are reflected in Nsight Compute reports as improved register utilization and reduced memory bottlenecks. Loop unrolling and templating yield substantial enhancements in small-scale computations. In combination with GPU-parallel element integration and small-matrix solvers, these optimizations form a cohesive strategy that maximizes performance while maintaining full consistency with the original CPU implementation.

It should be noted that the CPU baseline used for comparison represents the official, unmodified production code of Fluidity-Atmosphere, compiled with aggressive optimization flags `-O3 -ffast-math`. Under these flags, modern CPU compilers automatically apply substantial loop unrolling and vectorization. However, due to the warp-based execution model and strict register allocation of GPUs, the CUDA compiler frequently requires explicit manual directives (e.g., `#pragma unroll`) and compile-time size resolution (via templates) to achieve optimal instruction scheduling and register reuse. Thus, these GPU-specific manual optimizations are implemented to fully unlock the hardware’s architectural potential rather than to introduce an algorithmic disparity. The optimized code is listed in **Appendix A**.

### 3.4 GPU Parallelization of Small-Scale Linear Algebra Solvers

In addition to numerical integration, the construction of stabilization terms involves numerous small-scale linear algebraic operations, such as solving  $6 \times 6$  systems or computing eigen-decompositions of  $3 \times 3$  matrices. Even though these operations are apparently lightweight, they are called repeatedly for every element and Gauss point, resulting in a substantial cumulative cost. On CPUs, ~~such operations are inefficient because they are very small to amortize function-call overhead and cannot exploit vectorization effectively. Library-relying on standard library~~ routines such as LAPACK’s ~~`DSPEV`~~`DSPEV` or Fortran’s ~~intrinsic `solve` introduce additional latency because of memory indirection and cache misses~~solvers for these operations is highly inefficient. While a small  $6 \times 6$  matrix easily fits into the L1 data cache, gathering these matrices from an unstructured mesh via indirect addressing disrupts spatial locality. Furthermore, these independent tiny matrices offer minimal opportunity

for data reuse, limiting cache efficiency. From a software perspective, pre-compiled external library routines typically cannot be automatically inlined by the compiler within the tight element loop. Invoking them millions of times introduces profound function-call overhead, and their internal argument validation and branching dwarf the actual floating-point arithmetic.

To address this challenge, this study implements dedicated GPU-based small-matrix solvers and eigen-decomposition kernels as inline `__device__` operators.

- **Small linear systems (e.g.,  $6 \times 6$ ):** These are solved on GPUs using Gaussian elimination. The input is an augmented matrix  $A$  (in column-major layout, including the right-hand side) with dimensions  $m \times n$ . Pivoting and row exchanges are applied to control numerical errors, whereas column-major storage and in-place operations reduce register pressure and facilitate the alignment with GPU memory characteristics.
- **Eigen-decomposition of  $3 \times 3$  real symmetric matrices:** Both iterative and direct GPU solvers are implemented, based on the methods employed in prior research. To improve efficiency, the implementation employs template-based array classes and includes sorting functions for eigenvalues and eigenvectors. By exploiting symmetry, only six entries (the diagonal and upper triangular part) are stored, minimizing register usage and avoiding spills to local memory.

These GPU-implemented solvers are lightweight and reusable across kernels. The modular `__device__` design also promotes code reuse across physical modules and supports further fusion with integration kernels.

#### 4 GPU Parallelization of Matrix Assembly

In the FEM, matrix assembly serves as the critical bridge between local element-wise computations and the solution of global linear systems. As this stage involves extensive operations on sparse data structures and frequent memory access, it typically hinders the performance of the entire program. Therefore, migrating the matrix assembly procedure to GPUs and applying targeted optimizations is crucial for enhancing the computational efficiency of atmospheric models. This section introduces the global matrix storage formats, the element-wise parallel assembly strategy, and the GPU implementation of RHS vector assembly.

Before detailing our assembly strategy, it is worth noting that a prominent trend in high-performance finite-element simulations is to discard global matrix assembly in favor of matrix-free (or partially assembled) operator evaluations (Kronbichler and Kormann, 2012, 2013). Matrix-free algorithms were fundamentally developed to address the performance bottlenecks inherent in high-order finite elements. In high-order discretizations, full matrix assembly leads to an exponential explosion in memory footprint and floating-point operations per degree of freedom (DoF). Matrix-free approaches, typically coupled with sum factorization, suppress this complexity, thereby drastically increasing computational intensity and parallel efficiency (Fischer et al., 2020)

However, the dynamic framework evaluated in this study predominantly employs low-order linear elements ( $P_1$ ). For low-order FEM, the memory access per DoF is intrinsically small and remains comparable whether using fully assembled operators or on-the-fly matrix-free evaluations. Since low-order evaluations are heavily memory-bound, transitioning to matrix-free

305 methods does not yield the profound bandwidth savings observed in high-order regimes. Furthermore, explicitly assembling the global sparse matrix provides a critical advantage: it enables the use of highly optimized, generic Sparse Matrix-Vector multiplication (SpMV) kernels and sophisticated algebraic preconditioners, such as Algebraic Multigrid (AMG) and Incomplete LU (ILU) provided by PETSc, which are indispensable for the stability and efficiency of the implicit time-stepping solvers in Fluidity-Atmosphere. Therefore, accelerating the global sparse matrix assembly remains the most rational and impactful optimization pathway for this class of low-order dynamical cores.

#### 4.1 Global Matrix Assembly

310 Following local integration, the algorithm accumulates  $(A^e, F^e)$  into the global matrix  $A$  and vector  $F$  according to the connectivity information of the mesh. This procedure, widely recognized as the global assembly, transforms element-level contributions into a consistent global representation based on the mapping between local and global degrees of freedom, as shown in **Algorithm 2**. Here,  $\varepsilon$  is the set of elements and  $e$  is an element. The *elem* function performs element-wise computations to get element matrices. The  $L$  function retrieves the node numbering.

---

##### **Algorithm 2** The Global Matrix Assembly

---

**Output:** Global matrices  $A, F$

---

```

7 Initialize  $A, F$  to zero
  forall  $e \in \varepsilon$  do
8   Compute  $(A_e, F_e) = \text{elem}(e)$ 
   forall local degrees of freedom  $d_1$  of  $e$  do
9      $F(L(e, d_1)) += F_e(d_1)$ 
     forall local degrees of freedom  $d_2$  of  $e$  do
10       $A(L(e, d_1), L(e, d_2)) += A_e(d_1, d_2)$ 
11    end
12  end
13 end

```

---

315 In contrast to structured-grid models, where mesh nodes are arranged in a regular  $(i, j, k)$  indexing order and memory access can be performed sequentially and predictably, unstructured meshes lack geometric regularity. The connectivity of each element varies depending on its neighbours, and the mapping between local and global indices must be retrieved indirectly through lookup tables. Consequently, the assembly phase in unstructured FEM involves frequent non-contiguous global memory reads and writes, with irregular strides between consecutive memory locations. This destroys spatial locality and drastically increases  
320 cache miss rates, thereby amplifying the ratio of memory access time to floating-point computation.

On GPU architectures, these irregular access patterns exacerbate performance degradation. Concurrent threads typically need to update overlapping entries of the global sparse matrix, requiring synchronization or the use of atomic operations to

ensure correctness. The combined effects of irregular global memory traffic, low cache reuse, and write conflicts make matrix assembly a highly memory-bound process.

325 Consequently, global matrix assembly presents two major challenges: (1) the imbalance between memory traffic and arithmetic intensity, caused by the dominance of irregular global data movement over computation; (2) the difficulty of ensuring data consistency during concurrent updates. Cumulatively, these factors make matrix assembly another critical performance bottleneck, and thus a central focus of GPU parallel optimization in this work.

## 4.2 Sparse Matrix Storage Formats

330 Fluidity-Atmosphere employs different sparse storage formats for different types of physical fields. For scalar field matrices, the **compressed sparse row (CSR)** format is used. For vector field matrices such as three-component velocity, the **block-CSR (BCSR)** format is adopted.

For a scalar field, the local stiffness matrix can be expressed as Eq. (1):

$$K_{ij} = \int_{\Omega_e} (\nabla N_i)^T C (\nabla N_j) d\Omega \quad (1)$$

335 where  $N_i$  and  $N_j$  are basis functions,  $\Omega_e$  is the integration domain of the element, and  $C$  is the associated tensor. For scalar fields,  $N_i$  is a scalar and  $K_{ij}$  is a scalar integral, resulting in a  $4 \times 4$  local element matrix. By obtaining the global node indices  $n_i$  and  $n_j$  corresponding to the local nodes  $i$  and  $j$ , the result  $K_{ij}$  is updated in the global matrix entry  $(n_i, n_j)$ .

The global matrix is typically stored in the CSR format, which consists of three arrays: **values** (non-zero entries), **col\_index** (column indices), and **row\_pointers** (row offsets) (NVIDIA, 2025b). Within a row range, the target column can be located  
340 using binary search.

For vector fields, each node contains three degrees of freedom (DOFs). Thus, while assembling the local stiffness matrix, all interactions among the nodes and their DOFs must be considered. This results in a set of  $4 \times 4$  blocks, each of size  $3 \times 3$ :

$$K = \begin{bmatrix} K_{11} & K_{12} & K_{13} & K_{14} \\ K_{21} & K_{22} & K_{23} & K_{24} \\ K_{31} & K_{32} & K_{33} & K_{34} \\ K_{41} & K_{42} & K_{43} & K_{44} \end{bmatrix} \quad (2)$$

Each element of the element matrix  $K_{ij}$  is actually a  $3 \times 3$  matrix.

$$345 \quad K_{ij} = \begin{bmatrix} a & b & c \\ d & e & f \\ g & h & i \end{bmatrix} \quad (3)$$

Here, Fluidity adopts the BCSR format, which is structurally similar to CSR, but stores continuous block data in the value array. This block-based representation better supports sparse operations for vector fields.

### 4.3 GPU Parallel Element-Wise Assembly

In [our](#) GPU parallelization, the contributions of each mesh element are computed and stored in parallel, with each GPU thread  
350 responsible for one element. A dedicated kernel is launched to assemble element matrices.

In the implementation, each thread iterates over the entries  $K_{ij}$  of the local element matrix and ~~computes~~[looks up](#) the  
corresponding global non-zero indices. Given the global node indices  $n_i$  and  $n_j$ , the **row\_pointers** array is first used to locate  
the row range [ row\_pointers( $n_i$ ), row\_pointers( $n_i + 1$ ) ). Within this range, the column index  $n_j$  is searched using binary  
search. To enhance the efficiency, the implemented GPU assembly function consistently adopts binary search.

355 A significant challenge arises during parallel write-back, where race conditions may occur if multiple threads attempt to  
update the same non-zero entry simultaneously. An atomic operation is indivisible and guarantees consistency by preventing  
interference from other threads. Modern GPUs provide hardware-level support for atomic addition, enabling conflict-free  
concurrent updates without explicit locks. In this work, the atomic add approach is adopted for its efficiency and simplicity.  
The CUDA parallel assembly code is listed in **Appendix B**.

360 To summarize the complete execution pipeline, the global matrix assembly occurs entirely within the GPU device memory. Following the element-wise computations, the local element matrices are accumulated into the global sparse matrix arrays (i.e., the values array in CSR/BCSR format), which are pre-allocated on the GPU. This is achieved using the aforementioned parallel assembly kernel equipped with hardware-level atomicAdd operations. Upon the completion of the assembly kernel, the fully constructed global matrix arrays are transferred back to the CPU host memory via PCIe. The assembled matrix is then  
365 handed over to the CPU-bound PETSc library to perform the subsequent large-scale linear system solve.

### 4.4 GPU Parallel Assembly of Right-Hand-Side (RHS) Vectors

Similar to the global matrix, the RHS vector is assembled using an element-wise parallel strategy. Each GPU thread computes  
the nodal contributions of one element and accumulates them into the corresponding global vector entries.

The implementation first determines the indices of the nodes belonging to each element, then loads the nodal values, and  
370 finally applies **atomicAdd** operations to ensure correctness during concurrent accumulation. For cases where multiple vari-  
ables are associated with a node, appropriate offsets are added to the corresponding positions. The **Appendix C** illustrates the  
procedure of RHS assembly, which achieves efficient large-scale parallel accumulation while preserving correctness.

## 5 Results and Evaluation

### 5.1 Experimental Environment

375 This section presents a systematic analysis of the performance of the proposed GPU parallelization strategies. Experiments  
were conducted to first validate correctness on both CPU and GPU platforms, and then to evaluate performance in four aspects:  
element-wise computation, global matrix assembly, data transfer with computation overlap, and overall model performance.

**Table 2.** GPU & CPU and compiler information.

|                           |                                 |
|---------------------------|---------------------------------|
| GPU NVIDIA                | A100                            |
| Peak perf. (FP64)         | 9.7 TFLOPS                      |
| Max Clock Freq            | 1410 MHz                        |
| L1 Cache                  | 192 KiB                         |
| L2 Cache                  | 40960 KiB                       |
| SM per GPU                | 108                             |
| Register file size per SM | 256 KiB                         |
| <u>Device Memory BW</u>   | <u>1555 GB/s</u>                |
| PCIe bandwidth            | 32 GB/s                         |
| <hr/>                     |                                 |
| nvcc                      | 13.0                            |
| <hr/>                     |                                 |
| CPU                       | AMD EPYC 7713 64-Core Processor |
| ISA                       | X86_64                          |
| Max Clock Freq            | 3720 Mhz                        |
| L1 Cache                  | 8 MiB                           |
| L2 Cache                  | 64 MiB                          |
| Cores                     | 64                              |
| <u>Memory Bandwidth</u>   | <u>204.8 GB/s</u>               |
| <hr/>                     |                                 |
| gcc                       | 13.3                            |
| CMake                     | 3.22.1                          |
| gfortran                  | 13.3                            |
| mpicc                     | MPICH 3.4.2                     |
| Optimization              | -O3 -ffast-math                 |

The GPU and CPU experimental environments are shown in Table 2. All CPU baseline evaluations were executed using the specified number of CPU cores (MPI processes) on a single physical AMD EPYC 7713 processor.

380 GPU acceleration was applied to the momentum equation, advection equation, and stabilization term construction of Fluidity-Atmosphere. Then, the GPU-accelerated version was validated for correctness and evaluated for performance to ensure both accuracy and efficiency.

## 5.2 Validation Methodology

385 For validation of correctness, the 3D idealized mountain wave test case (Li et al., 2021) was used. The mountain wave test serves as a crucial validation procedure for assessing the dynamic framework model of the Fluidity-Atmosphere model in simulating orography-induced airflow. By comparing numerical results against theoretical solutions of idealized orographically

forced flows, this test effectively evaluates the capability of the model to capture mountain wave generation and propagation phenomena under complex topographic conditions. The computational domain spans 60 km in both horizontal dimensions with a vertical extent of 16 km. Adaptive mesh resolution dynamically ranges from 125 m to 10 km throughout the simulation domain, with mesh refinement actively guided by variations in velocity magnitude and potential temperature. The mesh consists of 554394 elements and 103635 nodes. A 3D bell-shaped mountain profile is mathematically described as follows:

$$h(x, y) = \frac{h_0}{\left(1 + \frac{x^2 + y^2}{a^2}\right)^{\frac{3}{2}}} \quad (4)$$

where  $h_0 = 400m$  represents the peak elevation and  $a = 1000m$  denotes the characteristic half-width parameter. The stratified atmospheric background is characterized by  $N = 0.01s^{-1}$ , while the surface potential temperature initializes at  $\theta_0 = 293.15K$ . The incoming flow maintains a constant velocity of  $u = (10, 0, 0)^T m/s$ . For numerical stability, an absorbing layer is implemented in the upper atmospheric region (10-16 km-altitude), with additional dissipative layers extending for 10 km inward from all lateral boundaries (comprehensive specifications available in Li et al., 2021).

In scientific applications ~~that require demanding~~ high-precision floating-point operations, ~~the variations in floating-point results for different architectures are evident and well-established.~~ In microscopic rounding differences between CPU and GPU architectures are inevitable. In a fully dynamic simulation, these bit-wise differences can cause the Adaptive Mesh Refinement (AMR) algorithm to split elements differently over time. Comparing results across divergent meshes necessitates spatial interpolation, which introduces algorithmic noise and obscures the underlying arithmetic consistency. To eliminate structural variations and rigorously validate the GPU implementation, we conduct evaluations under two complementary fixed-mesh scenarios.

First, to validate the core operators during the non-stationary initial stage, we extract the refined unstructured mesh generated at  $t = 3000$  s from an adaptive run and employ it as a fixed, static grid right from the beginning of the Mountainwave3D simulations, small floating-point differences result in different mesh divisions in the process of mesh adaptivity. For unstructured grids, using interpolation calculations for different mesh divisions result in significant errors. Therefore, a direct comparison of the simulation results of GPU and CPU from time zero cannot verify whether the GPU code is consistent with the CPU code calculation results. In the proposed method, simulation ( $t = 0$ ). Both the CPU and GPU versions simulate the transient phase up to  $t = 3000$  s with the AMR module deactivated. While this static mesh is not dynamically optimized for the early stages, it ensures an identical degree-of-freedom layout from  $t = 0$  and completely avoids spatial interpolation errors. Second, to verify long-term stability in the steady-state regime, the physical time of 3000 s is simulated using the CPU version to make the simulation reach a stable state. Then, the computation is restarted using both GPU and CPU versions of the program, keeping the mesh unchanged during simulation and advancing simulation is run up to  $t = 3000$  s under the standard CPU-AMR configuration until the wave profile stabilizes. The mesh is then fixed, and both versions advance the physical time to 5000 s. The comparison of the calculation results between the two versions is shown independently from  $t = 3000$  s to  $t = 5000$  s. The computational results for both scenarios are presented in Figure 4. The results indicate that the maximum difference between GPU For the transient fixed-mesh run (Figs. 4b) and CPU is on the negative fourteenth power of ten, indicating that the results of

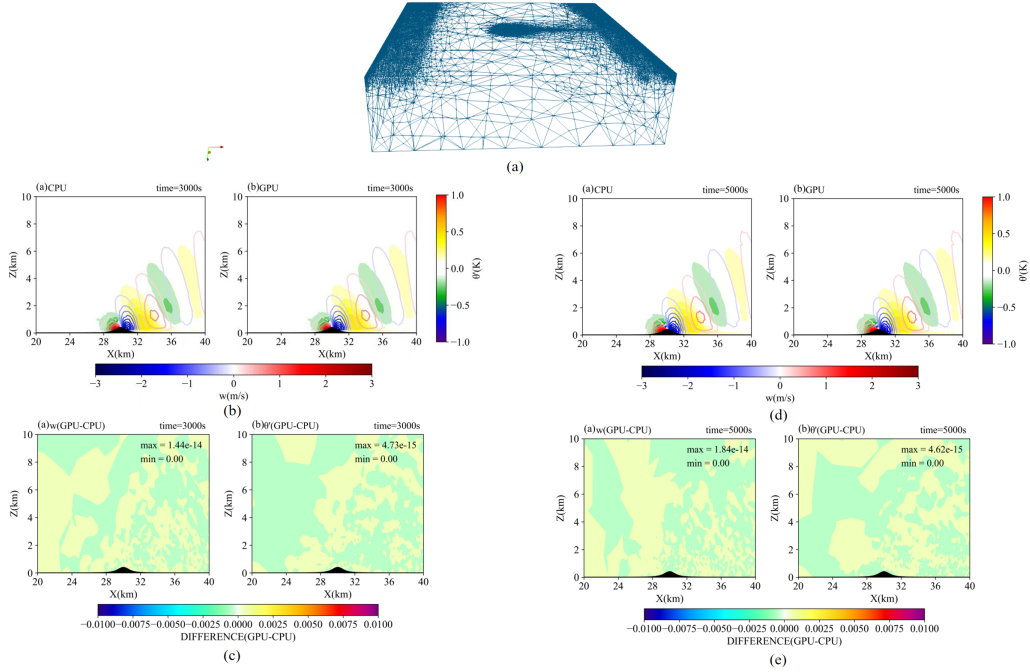

**Figure 4.** Comparison between the CPU baseline and the GPU-accelerated computation results and CPU-computation results under fixed-mesh configurations. (a) Mesh: The unstructured mesh layout extracted at  $t = 3000$  s; (b) The computation results of Simulated vertical velocity ( $w$ ) and potential temperature perturbation ( $\theta'$ ) fields at  $t = 3000$  s from the transient validation run (simulated continuously from  $t = 0$  using the fixed-mesh); (c) Absolute differences between CPU and GPU versions results at  $t = 3000$  s for the transient fixed-mesh run; (d) The Simulated fields at  $t = 5000$  s from the steady-state stability validation run (advanced from  $t = 3000$  s on the fixed-mesh); (e) Absolute differences between the CPU and the GPU versions results at  $t = 5000$  s for the steady-state stability run.

420 CPU and GPU are consistent 4c), the absolute differences between the CPU and GPU fields at  $t = 3000$  s peak at  $1.44 \times 10^{-14}$  for the vertical velocity ( $w$ ) and  $4.73 \times 10^{-15}$  for the potential temperature perturbation ( $\theta'$ ). For the steady-state continuation run (Figs. 4d and 4e), the differences remain bounded within a similar magnitude at  $t = 5000$  s. These minuscule variations strictly correspond to the double-precision machine epsilon, confirming that the GPU-accelerated operators are fundamentally and mathematically consistent with the original CPU baseline across all simulation phases.

### 425 5.3 Results and Discussion of Performance Optimization

#### 5.3.1 GPU Element-wise Computation Performance

In unstructured meshes, element node values are typically stored non-contiguously in memory. Thus, the performance of element-wise computation is primarily limited by memory access efficiency. While CPUs incur high memory overhead for non-contiguous access, GPUs leverage high bandwidth and massive thread parallelism to alleviate this bottleneck. Table 3 compares

**Table 3.** GPU Performance of GPU parallel element data access ([Mesh: 103,635 nodes, 554,394 elements; timings are averaged over 1,000 invocations](#)).

| Function       | CPU time (ms) | GPU time (ms) | Speedup |
|----------------|---------------|---------------|---------|
| ele_val_scalar | 6.628         | 0.0276        | 240.14  |
| ele_val_vector | 13.633        | 0.0768        | 177.51  |
| ele_val_tensor | 32.345        | 0.1976        | 163.69  |

**Table 4.** GPU kernel performance in element-wise computation ([Mesh: 103,635 nodes, 554,394 elements](#)).

| Function              | CPU time (ms) | GPU time (ms) | Speedup |
|-----------------------|---------------|---------------|---------|
| transform_to_physical | 525.575       | 3.964         | 132.59  |
| dshape_tensor_dshape  | 1865.290      | 1.969         | 947.33  |
| shape_shape           | 104.221       | 1.012         | 103.01  |
| shape_dshape          | 246.047       | 1.371         | 179.41  |
| get_edge_lengths      | 1369.171      | 7.476         | 183.14  |

430 GPU and CPU performance in scalar, vector, and tensor data access. [Specifically, functions such as ele\\_val\\_scalar](#)  
[serve as data-gathering routines that collect scattered node-based field values from global arrays into contiguous element-local](#)  
[arrays for each element prior to numerical integration. The results demonstrate the GPU’s efficiency in accelerating these](#)  
[heavily memory-bound ‘gather’ operations.](#) This is primarily because ~~scalar data structures are relatively simple, arrays storing~~  
[scalar fields have a simpler, lower-dimensional layout,](#) facilitating GPUs to completely leverage high-bandwidth access. All  
435 the performance profiling data were collected with the mesh in the Mountainwave3D simulation, in which the number of mesh  
nodes and elements are 103635 and 554394, respectively.

Furthermore, Table 4 presents the GPU performance of numerous core functions in Fluidity-Atmosphere (coordinate trans-  
formation, integration, and auxiliary routines). Results indicate that parallelizing dense element-wise computations on GPUs  
significantly accelerates the performance. All listed functions achieved more than **103**× speedups compared with CPU ver-  
440 sions. These functions are computationally intensive, involving repeated local linear system and eigenvalue/eigenvector solves  
for each element in ~~serial-single-core~~ CPU execution. In contrast, the GPU can execute such highly independent tasks concu-  
rently across thousands of threads, comprehensively leveraging parallelism.

To analyse the effects of GPU-oriented optimizations, we take the dshape\_tensor\_dshape function as an example.  
This function is a hotspot in finite-element computation, involving frequent access to gradients of shape functions at Gauss  
445 points and dense matrix multiplications/dot products. Table 5 shows performance enhancement due to loop unrolling and  
~~function-template-optimization~~ [optimization via the use of template functions](#). Notably, Fluidity-Atmosphere typically calls  
this routine with identical dshape1 and dshape2 array. However, for generality we also tested cases with two different

**Table 5.** Performance of `dshape_tensor_dshape` with optimizations ([Mesh: 554,394 elements](#)).

| Version                                     | dshape1 and dshape2 are<br>the same array. | dshape1 and dshape2 are<br>different arrays. |
|---------------------------------------------|--------------------------------------------|----------------------------------------------|
|                                             | Time (ms)                                  | Time (ms)                                    |
| Baseline                                    | 35.799                                     | 36.314                                       |
| Unroll                                      | 20.847                                     | 26.890                                       |
| Templated matrix product<br>and dot product | 1.969                                      | 3.689                                        |

**Table 6.** Global matrix assembly performance ([Mesh: 103,635 nodes, 554,394 elements](#)).

| Task   | CPU assembly time (ms) | GPU assembly time (ms) | Speedup |
|--------|------------------------|------------------------|---------|
| Matrix | 327.538                | 0.842                  | 389.02  |
| RHS    | 48.254                 | 0.116                  | 415.64  |

`dshape1` and `dshape2` arrays. While the same array case performs better, both scenarios show consistent performance gains.

450 Nsight Compute profiling further indicates that templated matrix product and dot product increased memory throughput from 70 % to 82.35 %, slightly improved compute throughput, and enhanced L1 cache hit rates. SASS code inspection revealed that baseline `__device__` functions were only locally reordered, thereby limiting the performance. After templating, the compiler applied deeper optimizations, interleaving SASS instructions between `__device__` and `__global__` functions, yielding significant performance enhancements.

455 These results confirm that GPU parallelization achieves order-of-magnitude acceleration in element-wise computations, while targeted optimizations further unlock the hardware potential.

### 5.3.2 Performance of Global Matrix Assembly Optimization

Table 6 shows assembly performance for the advection-diffusion matrix (Temperature) and the right-hand sides. Compared with CPU execution, GPU parallel assembly achieved speedups of up to  $389.02\times$  and  $415.64\times$ , respectively, highlighting 460 the advantages of massive threading and [high-ultra-high device memory](#) bandwidth. Compared with existing GPU studies on sparse matrix assembly, a substantially higher acceleration is achieved in the proposed method, demonstrating the superior performance of our kernel designs and data structures.

465 [Regarding the parallel assembly, it is worth noting that multiple elements inevitably share nodes in unstructured meshes, which can theoretically introduce memory contention when using atomic operations. To address this, we evaluated alternative algorithms that avoid atomic operations. While this contention-free approach further reduced the sparse matrix update time](#)

(e.g., from approximately 5 ms to 3 ms in specific test stages), it required an explicit mesh preprocessing step. This preprocessing consumed several seconds, introducing an overhead that far outweighed the modest kernel-level savings. Therefore, the direct atomic operation algorithm was selected for its simplicity and overall efficiency. This design choice is further supported by recent evaluations of unstructured-grid CFD applications on GPUs, which demonstrate that NVIDIA V100 and A100 architectures inherently deliver exceptional performance on kernels dominated by double-precision atomic updates, often outperforming complex register-based aggregation or data restructuring methods (Stone et al., 2021).

### 5.3.3 Hardware Utilization and Bottleneck Analysis

To further comprehend the GPU execution efficiency, we analyzed the hardware utilization of our core kernels using NVIDIA Nsight Compute. The theoretical FP64 peak performance of the A100 GPU is 9.7 TFLOP/s. However, in unstructured FEM frameworks, performance is predominantly bounded by memory bandwidth rather than compute capabilities.

For the element-wise integration kernel `dshape_tensor_dshape`, the Compute (SM) Throughput reached approximately 8.50% of the theoretical peak. While this kernel involves intensive small-matrix multiplications, its arithmetic intensity is inherently constrained by the necessity to fetch scattered nodal variables and coordinates from the global memory for each element. This is strongly evidenced by its Memory Throughput, which achieved an outstanding 90.44% of the device's peak memory bandwidth, indicating that the kernel is optimally saturating the hardware's memory subsystem.

Similarly, the global matrix assembly `assemble_csr_matrix` and RHS construction `rhs_addto_kernel` kernels are archetypal memory-bound operations. Their Compute Throughputs are limited to 7.93% and 18.29%, respectively, primarily because they execute sparse floating-point operations (such as atomic additions) amidst heavy indirect memory accesses. Instead, their execution efficiency is profoundly reflected in their Memory Throughputs, which achieved 79.48% and 82.98%, respectively. Given the highly irregular access patterns dictated by unstructured mesh connectivity (e.g., indirect addressing via `row_pointers` and `ndglno`), maintaining such high memory bandwidth utilization demonstrates that our data layout and atomic-based assembly strategies effectively saturate the hardware limits for these memory-intensive workloads.

### 5.3.4 CPU-GPU Data Transfer and Overlap with Computation

In hotspot acceleration, CPU-GPU data transfer is another critical performance factor. In our system, CPU and GPU are connected via PCIe 4.0  $\times$  16, with a bidirectional bandwidth of 32 GB/s. When the CPU has pinned memory, transfer bandwidth utilization is significantly higher than that with pageable memory. During Fluidity-Atmosphere computation, the type of data transferred frequently between the CPU and GPU include ~~includes~~ scalar, vector, and tensor field arrays, ~~and the element node~~ the `elementnode` connectivity array (`ndglno`), as well as the fully assembled global sparse matrix arrays returning from the GPU device memory to the host for PETSc solvers. Table 7 compares pinned and non-pinned transfer performance, displaying an evidently superior bandwidth with pinned memory.

In addition, CUDA provides stream concurrency and asynchronous APIs such as `cudaMemcpyAsync`, facilitating simultaneous data transfer and kernel execution. The `transform_to_physical` kernels can run concurrently with transfers of

**Table 7.** Pinned vs non-pinned memory transfer performance

| Data               | Size(Byte) | Non-pinned<br>time(ms) | Non-pinned<br>Bandwidth(GB/s) | Pinned<br>time(ms) | Pinned<br>BW(GB/s) |
|--------------------|------------|------------------------|-------------------------------|--------------------|--------------------|
| ndgIno array       | 8870304    | 0.686                  | 12.94                         | 0.348              | 25.47              |
| scalar field array | 829080     | 0.086                  | 9.67                          | 0.047              | 17.60              |
| vector field array | 2487240    | 0.204                  | 12.18                         | 0.105              | 23.60              |
| tensor field array | 7461720    | 0.586                  | 12.73                         | 0.332              | 22.44              |

**Table 8.** GPU acceleration performance of major modules.

| Functional module                            | CPU time (ms) | GPU time (ms) | Speedup |
|----------------------------------------------|---------------|---------------|---------|
| the advection-diffusion matrix (Temperature) | 2563.158      | 11.566        | 221.60  |
| the advection-diffusion matrix (WaterVapor)  | 2542.717      | 11.251        | 226.00  |
| the advection-diffusion matrix (CloudWater)  | 2566.037      | 11.296        | 227.17  |
| the advection-diffusion matrix (RainWater)   | 1877.409      | 9.481         | 198.02  |
| the momentum matrix                          | 12641.197     | 46.363        | 272.66  |
| the divergence matrix                        | 3657.007      | 21.497        | 170.12  |
| the pressure diffusion matrix                | 3505.105      | 28.507        | 122.96  |
| the projection matrix                        | 1126.354      | 10.944        | 102.92  |

subsequent physical field data. The transfer-computation overlap effectively mitigates communication bottlenecks and further leverages HPC system performance.

### 500 5.3.5 Performance of functional modules

After embedding GPU-accelerated element-wise computation and global assembly strategies into Fluidity-Atmosphere, we evaluated the overall performance at three levels: module, single timestep, and multi-process parallelism. In the restarting Mountainwave3D simulation, the pressure diffusion matrix was calculated only once, and the others were the average times of simulation timesteps which ranges from 3000 to 5000 s. Table 8 summarizes performance across major functional modules.

505 As the global sparse linear solver was not GPU-parallelized, the overall acceleration for the single-process execution remained limited. However, Fluidity-Atmosphere already supports MPI, enabling MPI+GPU hybrid execution for maximal performance. Table 9 compares the one timestep execution performance [of the CPU-only using different numbers of CPU cores \(MPI processes\)](#) and GPU-enabled configurations.

510 The results show that GPU acceleration achieved a **2.44× speedup** for single-process execution. With 4 MPI processes (each handling approximately 25,000 nodes and 140,000 elements), the hybrid MPI+GPU version achieved **8.57× speedup**

**Table 9.** The performance of GPU accelerated Fluidity-Atmosphere.

| Version                               | Time (s) | Speedup (vs 1CPU) |
|---------------------------------------|----------|-------------------|
| <u>CPU-only-1 CPU core (Baseline)</u> | 41.838   | 1.00              |
| 1 CPU <u>core</u> + 1 GPU             | 17.147   | 2.44              |
| 4 <u>CPUs-CPU cores</u>               | 13.376   | 3.13              |
| 4 <u>CPUs-CPU cores</u> +1 GPU        | 4.880    | 8.57              |

**Table 10.** Comparison of computational performance and runtime distribution across different configurations (Unit: Time in seconds, Percentage of total timestep).

| <u>Functional module</u>            | <u>Baseline (1 CPU core)</u> |                   | <u>1 CPU core + 1 GPU</u> |                   | <u>4 CPU cores + 1 GPU</u> |                   |
|-------------------------------------|------------------------------|-------------------|---------------------------|-------------------|----------------------------|-------------------|
|                                     | <u>Time (s)</u>              | <u>Percentage</u> | <u>Time (s)</u>           | <u>Percentage</u> | <u>Time (s)</u>            | <u>Percentage</u> |
| <u>Temperature Matrix</u>           | <u>2.467</u>                 | <u>5.95%</u>      | <u>0.0226</u>             | <u>0.13%</u>      | <u>0.0120</u>              | <u>0.25%</u>      |
| <u>WaterVapor Matrix</u>            | <u>2.471</u>                 | <u>5.96%</u>      | <u>0.0137</u>             | <u>0.08%</u>      | <u>0.0041</u>              | <u>0.08%</u>      |
| <u>CloudWater Matrix</u>            | <u>2.494</u>                 | <u>6.02%</u>      | <u>0.0139</u>             | <u>0.08%</u>      | <u>0.0038</u>              | <u>0.08%</u>      |
| <u>RainWater Matrix</u>             | <u>1.799</u>                 | <u>4.34%</u>      | <u>0.0104</u>             | <u>0.06%</u>      | <u>0.0029</u>              | <u>0.06%</u>      |
| <u>Momentum Matrix</u>              | <u>12.093</u>                | <u>29.19%</u>     | <u>0.0313</u>             | <u>0.18%</u>      | <u>0.0384</u>              | <u>0.79%</u>      |
| <u>Pressure Correction Matrix</u>   | <u>4.760</u>                 | <u>11.49%</u>     | <u>0.0165</u>             | <u>0.10%</u>      | <u>0.0092</u>              | <u>0.19%</u>      |
| <u>Total PETSc (Setup + Solver)</u> | <u>5.212</u>                 | <u>12.58%</u>     | <u>5.6045</u>             | <u>32.68%</u>     | <u>2.1921</u>              | <u>44.92%</u>     |
| <u>Other unaccelerated modules</u>  | <u>10.136</u>                | <u>24.46%</u>     | <u>11.4341</u>            | <u>66.68%</u>     | <u>2.6175</u>              | <u>53.63%</u>     |
| <u>Total timestep duration</u>      | <u>41.433</u>                | <u>100.00%</u>    | <u>17.147</u>             | <u>100.00%</u>    | <u>4.880</u>               | <u>100.00%</u>    |

compared with single CPU core execution. Table 9 presents the average times of simulation timesteps which ranges from 3000 to 5000 s.

515 Notably, the 4 CPU cores + 1 GPU configuration achieves an 8.57 $\times$  speedup, which is more than triple the speedup of the 1 CPU core + 1 GPU configuration (2.44 $\times$ ). This synergistic effect is attributed to two factors: first, the domain decomposition in multi-process execution allows the remaining CPU-bound linear solvers (PETSc) to benefit from improved cache locality on smaller sub-domains; second, multiple MPI processes can concurrently issue kernels to the GPU via CUDA streams, leading to higher hardware occupancy on the NVIDIA A100. As detailed in Table 10, this configuration effectively addresses the "bottleneck shift" dictated by Amdahl's Law. In the 1 CPU core + 1 GPU setup, GPU matrix assembly is compressed to less than 1% of the total time, leaving the PETSc solver and other unaccelerated modules as the dominant bottlenecks. However,  
520 by leveraging 4 MPI processes, the absolute execution time of the PETSc solver is dramatically reduced from 5.60 s to 2.19 s, and the time for other unaccelerated modules drops from 11.43 s to 2.62 s. This multi-core mitigation of the remaining CPU bottlenecks, combined with sustained GPU efficiency, strictly validates the 8.57 $\times$  overall performance gain.

## 6 Conclusions

This study focuses on the unstructured-mesh finite-element atmospheric model named Fluidity-Atmosphere, thereby address-  
525 ing the computational bottlenecks in element-wise computations and matrix assembly. Leveraging the architectural features of  
the NVIDIA A100 GPU and the CUDA programming model, we designed and implemented GPU-oriented parallel optimiza-  
tion strategies. The proposed high-performance GPU kernels substantially enhanced the computational efficiency while solving  
the momentum equations, advection equations, and stabilization term construction, thereby accelerating critical processes in  
atmospheric numerical simulations. For element-wise computations, template-based kernel design and deep optimizations  
530 achieved speedups ranging from tens to several hundred times. With asynchronous data transfer and MPI parallelization, an  
overall acceleration that is 8.57 times greater than that of the CPU version was achieved using four processes while ensur-  
ing correctness and stability in multi-time step simulations. The proposed parallelization methods substantially enhance the  
performance of atmospheric models on heterogeneous systems, remarkably extending the support for high-performance imple-  
mentations of unstructured-mesh models. Future work will focus on further overcoming performance bottlenecks in the overall  
535 simulation, particularly by migrating the sparse linear solver (which is still CPU-dependent) to GPUs, thereby facilitating  
end-to-end acceleration.

*Code and data availability.* The original Fluidity model is distributed free of charge under the GNU Lesser General Public License (LGPL).  
The source code is publicly available from its official repository at <https://fluidityproject.github.io/get-fluidity.html> (AMCG, 2014). The  
version used in this study corresponds to Fluidity release 2025.12.

540 The GPU-accelerated extension developed in this work is permanently archived at Zenodo. The version used to generate all results  
presented in this paper corresponds to release v2 and is available at: <https://doi.org/10.5281/zenodo.18799735> (Fu, 2026). All simulation  
data produced in this study are publicly available at <https://doi.org/10.5281/zenodo.17824051> (Li et al., 2025).

The Zenodo archive includes: (1) the complete GPU-modified source files, (2) CUDA kernels and GPU interface implementation, (3)  
compilation scripts, (4) a detailed README file providing step-by-step instructions for reproducing the numerical experiments and figures  
545 reported in this paper.

## Appendix A: ~~Appendix A~~Code

---

```
1: template<int T_M>  
2: __device__ double dot_product_t(double*__restrict__ a,  
550 3: double* __restrict__ b) {  
4:     double r=0.0;  
5:     #pragma unroll  
6:     for(int i=0; i<T_M; i++) {  
7:         r += a[i]*b[i];
```

```

555 8:     }
9:     return r;
10: }
11:
12: // T_M, T_N, T_K: Matrix dimensions for generic small matrix multiplication
560 13: template<int T_M, int T_N, int T_K>
14: __device__ void __forceinline__ matmul_t(const double* a, const double* b,
15: double*C){
16: __device__ void __forceinline__ matmul_t(const double* a, const double* b, double* C){
17:     for (int mi = 0; mi < T_M; ++mi) {
565 18:         for (int ki = 0; ki < T_K; ++ki) {
19:             #pragma unroll
20:             for (int ni = 0; ni < T_N; ++ni) {
21:                 // Column-major layout stride; efficient due to thread-local register/L1 c
22:                 C[ni* T_M + mi] += a[ki * T_M + mi] * b[T_K * ni + ki];
570 23:             }
24:         }
25:     }
26: }
27:
575 28: // T_dim: Spatial dimension (e.g., 3 for 3D)
29: // T_loc1, T_loc2: Number of local nodes per element
30: // T_ngi: Number of Gauss integration points
31: template<int T_dim, int T_loc1, int T_loc2, int T_ngi>
32: __device__ void dshape_tensor_dshape_unroll_t(const double *dshapel,
580 33: const double *tensor, const double *dshape2, const double *detwei, double *r){
34:     double tmp[T_dim]={0.0}, mat_mul[T_dim]={0.0}, dotproduct=0.0;
35:     for(int gi=0; gi< T_ngi;++gi){
36:         double gidetwei=detwei[gi];
37:         for(int iloc=0;iloc<T_loc1;iloc++){
585 38:             #pragma unroll
39:             for(int n=0;n<T_dim;++n){
40:                 tmp[n]=dshapel[n*T_ngi*T_loc1+gi*T_loc1+iloc];
41:                 mat_mul[n] = 0.0;
42:             }

```

```

590 43: ///<1,3,3> literals explicitly used to unroll 3D spatial vector-tensor interactio
44:     matmul_t<1,3,3>(tmp,&tensor[gi*T_dim*T_dim],mat_mul);
45: for(int jloc=0;jloc<T_loc2;jloc++){
46:     #pragma unroll
47: for(int n=0;n<T_dim;++n){
595 48:     tmp[n]=dshape2[n*T_ngi*T_loc2+gi*T_loc2+jloc];
49: }
50: dotproduct = dot_product_t<T_dim>(mat_mul,tmp);
51: r[jloc*T_loc1+iloc]=r[jloc*T_loc1+iloc]+dotproduct*gidetwei;
52: }
600 53: }
54: }
55: }

```

---

## Appendix B: ~~Appendix B~~Code

```

605 template<int T_dim, int T_loc, int T_ngi>
__global__ void assemble_csr_matrix(double *result, double* values,
int *row_pointers, int *col_index, int *ndgln, const int ele_num){
    int element_index = blockIdx.x*blockDim.x + threadIdx.x;
    if(element_index>=ele_num) return;
610    int loc1=T_loc;
    int loc2=T_loc;
    int mpos=0,base=0,upper_j=0,upper_pos=0,lower_j=0,lower_pos=0,
        this_pos=0,this_j=0;
    int inode[T_loc]={0};
615    int j=0;
    double *element_result=result + element_index *T_loc * T_loc;
    int *row=nullptr;
    int iloc=0, jloc=0, n=0;
    //ndgln stores the connectivity for neighbouring elements.
620    for(int i = 0; i < T_loc; ++i){
        inode[i]= ndgln[element_index * loc1 + i];
    }

```

```

for(iloc=0;iloc<loc1;iloc++){
    //the index in Fluidity-Atmosphere Fortran code is from 1.
625    base = row_pointers[inode[iloc]-1]-1;
        n = row_pointers[inode[iloc]] -1 - base;
        for(jloc=0;jloc<loc2;jloc++){
            if(element_result[jloc*loc1+iloc]==0)continue;
            row = col_index+base;
630            upper_pos=n-1;
                upper_j=row[n-1]-1;
                lower_pos=0;
                lower_j=row[0]-1;
                mpos=-2;
635                j = inode[jloc]-1;
                    if (upper_j<j){
                        mpos=-1;
                    }else if (upper_j==j){
                        mpos=upper_pos+base;
640                    }else if (lower_j>j){
                        mpos=-1;
                    }else if(lower_j==j){
                        mpos=lower_pos+base;
                    }
645
                while(((upper_pos-lower_pos)>1)&&(mpos==-2)){
                    this_pos=(upper_pos+lower_pos)/2;
                    this_j=row[this_pos]-1;
                    if(this_j == (inode[jloc]-1)){
650                        mpos=this_pos+base;
                    }
                    else if(this_j > (inode[jloc]-1)){
                        upper_j=this_j;
                        upper_pos=this_pos;
655                    }
                    else{
                        lower_j=this_j;

```

```

        lower_pos=this_pos;
    }
660     }
        if(mpos<0){
        }else{
            atomicAdd(values+mpos,element_result[jloc*loc1+iloc]);
        }
665     }
    }
}

```

### Appendix C: ~~Appendix C~~Code

```

template<int T_loc>
670 __global__ void rhs_addto_kernel(GpuScalarField *field, const int ele_num,
double *gpu_ele_val){
    int element_index = blockDim.x * blockIdx.x + threadIdx.x;
    if(element_index >=ele_num) return;
    //element_index will be used to find the node indexes starting from 1.
675 element_index = element_index + 1;
    int nodes[T_loc];
    //get the node indexes of current element.
    gpu_ele_nodes_scalar(*field, element_index,nodes);
    double *ptr = gpu_ele_val + (element_index -1)*T_loc;
680 #pragma unroll
    for(int i = 0; i < T_loc;++i){
        atomicAdd(&(*field).val[(nodes[i] -1)],*(ptr+i));
    }
}

```

685 *Author contributions.* **Conceptualization & Methodology:** Li L., Li J. and Li H. provided technical guidance and supervision.  
**Software & Investigation:** Li L., Zheng X. and Fu X. developed the software and performed the testing.  
**Writing - Original Draft:** Fu X. prepared the manuscript.  
**Writing - Review & Editing:** Li L. and Li J. revised the manuscript. All co-authors reviewed and approved the final manuscript.

*Competing interests.* The authors declare there are no conflicts of interest for this manuscript.

690 *Acknowledgements.* This work is jointly supported by the National Key R&D Program of China (Grant No. 2023YFC3705701), the State Key Laboratory of Atmospheric Environment and Extreme Meteorology (2024ZD04). Dr. J. Li thanks for the technical support of the National Large Scientific and Technological Infrastructure "Earth System Numerical Simulation Facility" (Grant 2025-EL-PT-000886, <https://cstr.cn/31134.02.EL>).

## References

- 695 AMCG: Fluidity manual, <https://fluidityproject.github.io/get-fluidity.html>, 2014.
- AMD: CUDA to HIP API Function Comparison, [https://rocm.docs.amd.com/projects/HIP/en/latest/reference/api\\_syntax.html](https://rocm.docs.amd.com/projects/HIP/en/latest/reference/api_syntax.html), 2025.
- Bogenschutz, P. A., Clevenger, T. C., Bradley, A. M., Caldwell, P. M., Beydoun, H., Mahfouz, N., Keen, N. D., Guba, O., Bertagna, L., Foucar, J., Zhang, J., and Donahue, A. S.: High Performance, High Fidelity: A GPU-Accelerated Doubly-Periodic Configuration of the Simple Cloud-Resolving E3SM Atmosphere Model Version 1 (DP-SCREAMv1), *Journal of Advances in Modeling Earth Systems*, 17, e2025MS005 127, <https://doi.org/10.1029/2025MS005127>, 2025.
- 700 Böhm, F., Bauer, D., Kohl, N., Alappat, C. L., Thönnies, D., Mohr, M., Köstler, H., and Rüde, U.: Code Generation and Performance Engineering for Matrix-Free Finite Element Methods on Hybrid Tetrahedral Grids, *SIAM Journal on Scientific Computing*, 47, B131–B159, <https://doi.org/10.1137/24M1653756>, 2025.
- Conde, D. A. S., Ferreira, R. M. L., Canelas, R., Ricardo, A. M., and Mendes, L.: A Distributed-Heterogeneous Design for Explicit Hyperbolic Solvers. Application to Tsunami Urban Run-Up Modelling, *Journal of Advances in Modeling Earth Systems*, 17, e2024MS004 602, <https://doi.org/10.1029/2024MS004602>, 2025.
- 705 Czarnul, P., Proficz, J., and Drypczewski, K.: Survey of Methodologies, Approaches, and Challenges in Parallel Programming Using High-Performance Computing Systems, *Scientific Programming*, 2020, 4176 794, <https://doi.org/10.1155/2020/4176794>, 2020.
- Davies, D. R., Wilson, C. R., Kramer, S. C., Piggott, M. D., Le Voci, G., and Collins, G. S.: Fluidity: A New Adaptive, Unstructured Mesh Geodynamics Model, in: *EGU General Assembly Conference Abstracts*, EGU General Assembly Conference Abstracts, p. 5364, 2010.
- 710 Farrell, P. E., Piggott, M. D., Pain, C. C., Gorman, G. J., and Wilson, C. R.: Conservative interpolation between unstructured meshes via supermesh construction, *Computer Methods in Applied Mechanics and Engineering*, 198, 2632–2642, <https://doi.org/10.1016/j.cma.2009.03.004>, 2009.
- Fischer, P., Min, M., Rathnayake, T., Dutta, S., Kolev, T., Dobrev, V., Camier, J.-S., Kronbichler, M., Warburton, T., Swirydowicz, K., and Brown, J.: Scalability of High-Performance PDE Solvers, *International Journal of High Performance Computing Applications*, 34, 562–586, <https://doi.org/10.1177/1094342020915762>, 2020.
- 715 Fu, X.: GPU-Accelerated Implementation of the Fluidity-Atmosphere Dynamical Core, <https://doi.org/10.5281/zenodo.18799735>, 2026.
- Georgescu, S., Chow, P., and Okuda, H.: GPU Acceleration for FEM-Based Structural Analysis, *Archives of Computational Methods in Engineering*, 20, 111–121, <https://doi.org/10.1007/s11831-013-9082-8>, 2013.
- 720 Goddeke, D., Buijssen, S., Wobker, H., and Turek, S.: GPU acceleration of an unmodified parallel finite element Navier-Stokes solver, in: *Proceedings of the 2009 International Conference on High Performance Computing and Simulation, HPCS 2009*, pp. 12 – 21, <https://doi.org/10.1109/HPCSIM.2009.5191718>, 2009.
- Jendersie, R., Lessig, C., and Richter, T.: A GPU parallelization of the neXtSIM-DG dynamical core (v0.3.1), *Geosci. Model Dev.*, 18, 3017–3040, <https://doi.org/10.5194/gmd-18-3017-2025>, 2025.
- 725 Kiran, U., Gautam, S. S., and Sharma, D.: GPU-based matrix-free finite element solver exploiting symmetry of elemental matrices, *Computing*, 102, 1941–1965, <https://doi.org/10.1007/s00607-020-00827-4>, 2020.
- Kronbichler, M. and Kormann, K.: A generic interface for parallel cell-based finite element operator application, *Computers Fluids*, 63, 135–147, <https://doi.org/10.1016/j.compfluid.2012.04.012>, 2012.
- Kronbichler, M. and Kormann, K.: Fast Matrix-Free Evaluation of Discontinuous Galerkin Finite Element Operators, *ACM Transactions on Mathematical Software*, 45, 1–40, <https://doi.org/10.1145/3325864>, 2019.
- 730

- Li, J., Zheng, J., Zhu, J., Fang, F., Pain, C. C., Steppeler, J., Navon, I. M., and Xiao, H.: Performance of Adaptive Unstructured Mesh Modelling in Idealized Advection Cases over Steep Terrains, *Atmosphere*, 9, <https://doi.org/10.3390/atmos9110444>, 2018.
- Li, J., Fang, F., Steppeler, J., Zhu, J., Cheng, Y., and Wu, X.: Demonstration of a three-dimensional dynamically adaptive atmospheric dynamic framework for the simulation of mountain waves, *Meteorology and Atmospheric Physics*, 133, 1627–1645, <https://doi.org/10.1007/s00703-021-00828-8>, 2021.
- Li, L., Fu, X., Zheng, X., Li, H., and Li, J.: Atmospheric Mountain Wave Simulation Dataset (Fluidity-Atmosphere), <https://doi.org/10.5281/zenodo.17824052>, 2025.
- Macioł, P., Płaszewski, P., and Banaś, K.: 3D finite element numerical integration on GPUs, *Procedia Computer Science*, 1, 1093–1100, <https://doi.org/10.1016/j.procs.2010.04.121>, 2010.
- 740 Michalakes, J.: HPC for Weather Forecasting, in: *Parallel Algorithms in Computational Science and Engineering*, edited by Grama, A. and Sameh, A. H., pp. 297–323, Springer International Publishing, Cham, ISBN 978-3-030-43736-7, [https://doi.org/10.1007/978-3-030-43736-7\\_10](https://doi.org/10.1007/978-3-030-43736-7_10), 2020.
- Mills, R. T., Adams, M. F., Balay, S., Brown, J., Dener, A., Knepley, M., Kruger, S. E., Morgan, H., Munson, T., Rupp, K., Smith, B. F., Zampini, S., Zhang, H., and Zhang, J.: Toward performance-portable PETSc for GPU-based exascale systems, *Parallel Computing*, 108, <https://doi.org/10.1016/j.parco.2021.102831>, 2021.
- 745 102 831, <https://doi.org/10.1016/j.parco.2021.102831>, 2021.
- Müller, E. H., Scheichl, R., and Vainikko, E.: Petascale solvers for anisotropic PDEs in atmospheric modelling on GPU clusters, *Parallel Computing*, 50, 53–69, <https://doi.org/10.1016/j.parco.2015.10.007>, 2015.
- NVIDIA: CUDA C++ Programming Guide, <https://docs.nvidia.com/cuda/cuda-c-programming-guide/index.html>, 2025a.
- NVIDIA: Sparse Matrix Formats, [https://docs.nvidia.com/nvpl/latest/sparse/storage\\_format/sparse\\_matrix.html](https://docs.nvidia.com/nvpl/latest/sparse/storage_format/sparse_matrix.html), 2025b.
- 750 Petersen, M. R., Asay-Davis, X. S., Barthel, A. M., Begeman, C. B., Bishnu, S., Brus, S. R., Jones, P. W., Kang, H.-G., Kim, Y., Mametjanov, A., O’Neill, B., Ringel, K. K., Smith, K. M., Sreepathi, S., Van Roekel, L. P., and Waruszewski, M.: The Ocean Model for E3SM Global Applications: Omega Version 0.1.0. A New High-Performance Computing Code for Exascale Architectures, *EGUsphere*, 2025, 1–37, <https://doi.org/10.5194/egusphere-2025-3500>, 2025.
- Ratnakar, S. K., Sanfui, S., and Sharma, D.: Graphics Processing Unit-Based Element-by-Element Strategies for Accelerating Topology Optimization of Three-Dimensional Continuum Structures Using Unstructured All-Hexahedral Mesh, *Journal of Computing and Information Science in Engineering*, 22, 021 013, <https://doi.org/10.1115/1.4052892>, 2021.
- 755 021 013, <https://doi.org/10.1115/1.4052892>, 2021.
- Rudi, J., Malossi, A. C. I., Isaac, T., Stadler, G., Gurnis, M., Staar, P. W. J., Ineichen, Y., Bekas, C., Curioni, A., and Ghattas, O.: An extreme-scale implicit solver for complex PDEs: highly heterogeneous flow in earth’s mantle, in: *SC ’15: Proceedings of the International Conference for High Performance Computing, Networking, Storage and Analysis*, pp. 1–12, <https://doi.org/10.1145/2807591.2807675>, 2015.
- 760 1–12, <https://doi.org/10.1145/2807591.2807675>, 2015.
- Sanfui, S. and Sharma, D.: A three-stage graphics processing unit-based finite element analyses matrix generation strategy for unstructured meshes, *International Journal for Numerical Methods in Engineering*, 121, 3824–3848, <https://doi.org/10.1002/nme.6383>, 2020.
- Sanfui, S. and Sharma, D.: Symbolic and Numeric Kernel Division for Graphics Processing Unit-Based Finite Element Analysis Assembly of Regular Meshes With Modified Sparse Storage Formats, *Journal of Computing and Information Science in Engineering*, 22, <https://doi.org/10.1115/1.4051123>, 2021.
- 765 <https://doi.org/10.1115/1.4051123>, 2021.
- Simek, V., Dvorak, R., Zboril, F., and Kunovsky, J.: Towards Accelerated Computation of Atmospheric Equations Using CUDA, in: *2009 11th International Conference on Computer Modelling and Simulation*, pp. 449–454, <https://doi.org/10.1109/UKSIM.2009.25>, 2009.

- Stone, C. P., Walden, A., Zubair, M., and Nielsen, E. J.: Accelerating unstructured-grid CFD algorithms on NVIDIA and AMD GPUs, in: 2021 IEEE/ACM 11th Workshop on Irregular Applications: Architectures and Algorithms (IA3), pp. 19–26, 770 <https://doi.org/10.1109/IA354616.2021.00010>, 2021.
- Sulyok, A. A., Balogh, G. D., Reguly, I. Z., and Mudalige, G. R.: Locality optimized unstructured mesh algorithms on GPUs, *Journal of Parallel and Distributed Computing*, 134, 50–64, <https://doi.org/10.1016/j.jpdc.2019.07.011>, 2019.
- Take, E. and Russell, R.: Applications of the finite element method to modeling the atmospheric boundary layer, *Computers & Mathematics with Applications*, 16, 57–68, [https://doi.org/10.1016/0898-1221\(88\)90024-7](https://doi.org/10.1016/0898-1221(88)90024-7), 1988.
- 775 Thibault, J. and Senocak, I.: CUDA Implementation of a Navier-Stokes Solver on Multi-GPU Desktop Platforms for Incompressible Flows, in: 47th AIAA Aerospace Sciences Meeting including The New Horizons Forum and Aerospace Exposition, <https://doi.org/10.2514/6.2009-758>, 2012.
